# Supplementary material for: Fluorocarbene, fluoroolefin, and fluorocarbyne complexes of Rh
Source: PubMed Central journal article supplement (PMC5414389; doi:10.1039/c6sc05391b), 2017-02-16
Supplement: SC-008-C6SC05391B-s001.pdf [file SC-008-C6SC05391B-s001.pdf]

## **Electronic Supplementary Information**

### **Fluorocarbene, Fluorocarbyne, and Fluorocarbyne Complexes of Rh**

*Christopher J. Pell<sup>a</sup>, Yanjun Zhu<sup>a</sup>, Rafael Huacuja<sup>a</sup>, David E. Herbert<sup>a</sup>,  
Russell P. Hughes<sup>b\*</sup>, and Oleg V. Ozerov<sup>a\*</sup>*

<sup>a</sup>Department of Chemistry, Texas A&M University, College Station, Texas 77842

<sup>b</sup>Department of Chemistry, Dartmouth College, Hanover, New Hampshire 03755

## **Table of Contents**

|      |                                                                  |     |
|------|------------------------------------------------------------------|-----|
| I.   | General Considerations                                           | S2  |
| II.  | Synthesis and Characterization                                   | S3  |
| III. | X-ray Crystallography                                            | S26 |
| IV.  | Computational Methods                                            | S28 |
| V.   | Natural Localized Molecular Orbitals for (PNP)Rh=CH <sub>2</sub> | S29 |
| VI.  | Cartesian Coordinates                                            | S30 |
| VII. | References                                                       | S58 |

## **I. General Considerations**

Unless specified otherwise, all manipulations were performed under an argon atmosphere using standard Schlenk line or glove box techniques. Toluene, pentane, and isooctane were dried and deoxygenated (by purging) using a solvent purification system by MBraun and stored over molecular sieves in an Ar-filled glove box. C<sub>6</sub>D<sub>6</sub> and CDCl<sub>3</sub> was dried over and distilled from Na/K/Ph<sub>2</sub>CO/18-crown-6 and stored over molecular sieves in an Ar-filled glove box. Fluorobenzene and benzotrifluoride were dried with and then distilled from CaH<sub>2</sub> and stored over molecular sieves in an Ar-filled glove box. Me<sub>3</sub>SiCF<sub>3</sub> was degassed prior to use and stored in an Ar-filled glove box. CsF was grounded and dried at 130 °C under vacuum for 2 days. (PNP)Rh(TBE)<sup>1</sup>, [(Et<sub>3</sub>Si)<sub>2</sub>(SO<sub>3</sub>CF<sub>3</sub>)](HCB<sub>11</sub>Cl<sub>11</sub>)<sup>2</sup>, and [Ph<sub>3</sub>C](HCB<sub>11</sub>Cl<sub>11</sub>)<sup>2</sup>, was prepared according to the published procedures. [(PNP)Rh]<sub>2</sub>(μ-N<sub>2</sub>) was previously characterized.<sup>3</sup> All other chemicals were used as received from commercial vendors unless otherwise specified.

### III. Synthesis and Characterization

**Synthesis of (PNP)Rh=CF<sub>2</sub>.** Method 1. (PNP)Rh(TBE) (105 mg, 0.170 mmol), Me<sub>3</sub>SiCF<sub>3</sub> (50.0 μL, 0.340 mmol) and CsF (25.0 mg, 0.170 mmol) were placed in a Teflon flask in about 3 mL C<sub>6</sub>D<sub>6</sub>. The reaction mixture was stirred vigorously and heated at 70 °C for 6 d. NMR analysis revealed the presence of 85% of (PNP)Rh=CF<sub>2</sub> and 14% of (PNP)Rh(C<sub>2</sub>F<sub>4</sub>) together with 1% of (PNP)Rh(CO). The same distribution of products (85% (PNP)Rh=CF<sub>2</sub>, 14% (PNP)Rh(C<sub>2</sub>F<sub>4</sub>), and 1% (PNP)Rh(CO)) was obtained when the mixture was heated for 3 d at 80 °C. The reaction mixture was passed through Celite. The volatiles were removed under vacuum and the residue was extracted with pentane. The pentane solution was passed through Celite again. The volatiles were removed under vacuum. The residue was dissolved in isooctane and placed in the freezer at -35 °C. Small amount of precipitate was formed the next day. The supernatant was filtered through Celite, then the volatiles were removed and the residue dried under vacuum. NMR analysis indicated > 98% purity of (PNP)Rh=CF<sub>2</sub> (51 mg, 52% yield).

Method 2. (PNP)Rh(TBE) (400 mg, 0.65 mmol) was dissolved in toluene in a 50 mL PTFE screw-top flask with a PTFE-coated stir bar. The solution was degassed and filled with 1 atm of CHF<sub>3</sub> and heated overnight at 80 °C. The volatiles were removed under vacuum in the morning and the product was extracted with pentane and filtered through a pad of silica and Celite. The volatiles were removed to yield a dark red powder (226 mg) that was composed of 3% (PNP)Rh(CO), 81% (PNP)Rh(=CF<sub>2</sub>), and 16% [(PNP)Rh]<sub>2</sub>(μ-N<sub>2</sub>). <sup>1</sup>H NMR (C<sub>6</sub>D<sub>6</sub>): δ 7.66 (d, *J* = 8 Hz, 2H, (PNP)Aryl-H), 7.10 (br, 2H, (PNP)Aryl-H), 6.80 (d, *J* = 8 Hz, 2H, (PNP)Aryl-H), 2.43 (m, 4H, CH(CH<sub>3</sub>)<sub>2</sub>), 2.19 (s, 6H, Ar-CH<sub>3</sub>), 1.27 (dvt (app. q.), *J* = 8 Hz, 12 H, CH(CH<sub>3</sub>)<sub>2</sub>), 1.13 (dvt (app. q.), *J* = 8 Hz, 12 H, CH(CH<sub>3</sub>)<sub>2</sub>). <sup>31</sup>P{<sup>1</sup>H}NMR (C<sub>6</sub>D<sub>6</sub>) : 53.7 (dt, *J*<sub>Rh-P</sub> = 144 Hz, *J*<sub>F-P</sub> = 30 Hz). <sup>19</sup>F NMR (C<sub>6</sub>D<sub>6</sub>): 95.6 (dt, *J*<sub>Rh-F</sub> = 49 Hz, *J*<sub>P-F</sub> = 30 Hz). <sup>13</sup>C{<sup>1</sup>H}NMR (C<sub>6</sub>D<sub>6</sub>):

206.3 (dt,  $J_{\text{Rh-C}} = 85$  Hz,  $J_{\text{C-P}} = 12$  Hz,  $J_{\text{C-F}} = 454$  Hz), 162.3 (t,  $J = 11$  Hz), 132.4, 131.9, 125.8 (t,  $J = 3$  Hz), 122.3 (t,  $J = 18$  Hz), 116.1 (t,  $J = 3$  Hz), 25.4 (t,  $J = 11$  Hz), 20.5, 19.3 (t,  $J = 3$  Hz), 18.5. Elem. Anal. Found (Calculated) for  $\text{C}_{27}\text{H}_{40}\text{F}_2\text{NP}_2\text{Rh}$ : C, 55.81 (55.77); H, 6.96 (6.93); N, 2.35 (2.41).

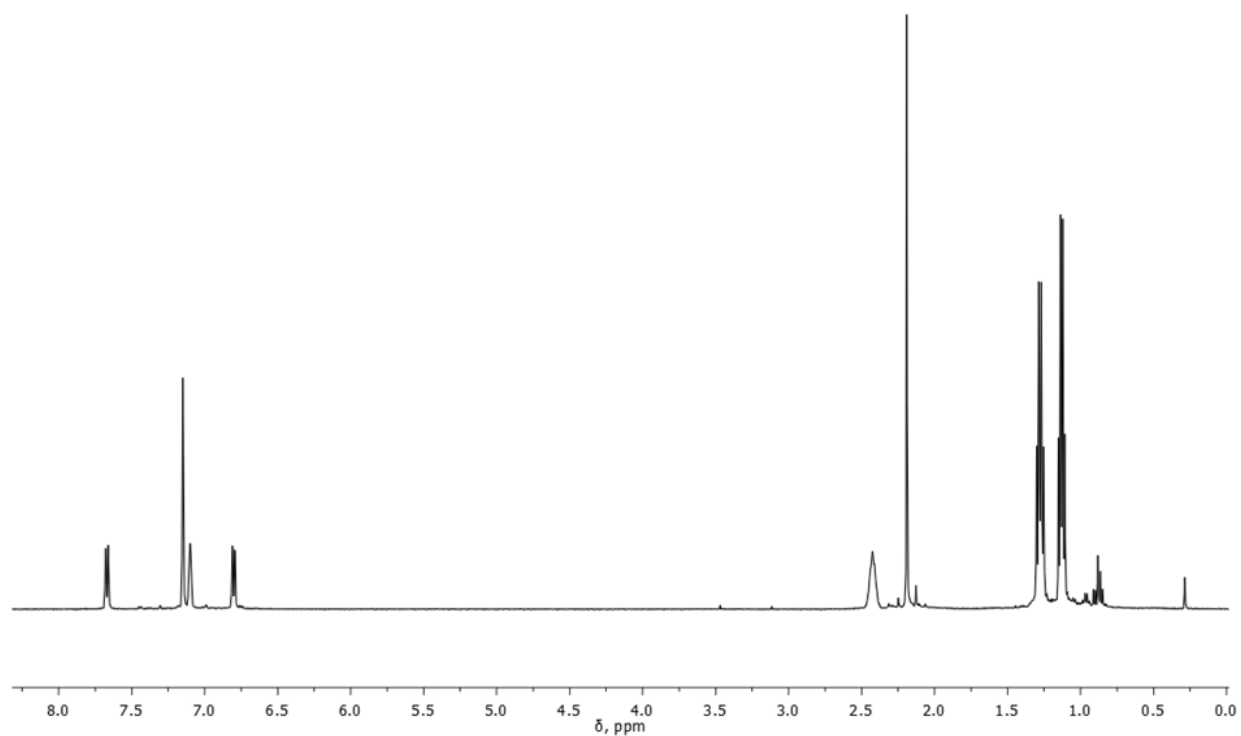

**Figure S1:**  $^1\text{H}$  NMR spectrum of  $(\text{PNP})\text{Rh}=\text{CF}_2$  in  $\text{C}_6\text{D}_6$ . Residual pentane is visible at 0.86 ppm. Residual isooctane is visible at 0.88 ppm, 0.90 ppm, 0.92 ppm. Residual silicone grease is visible at 0.28 ppm.

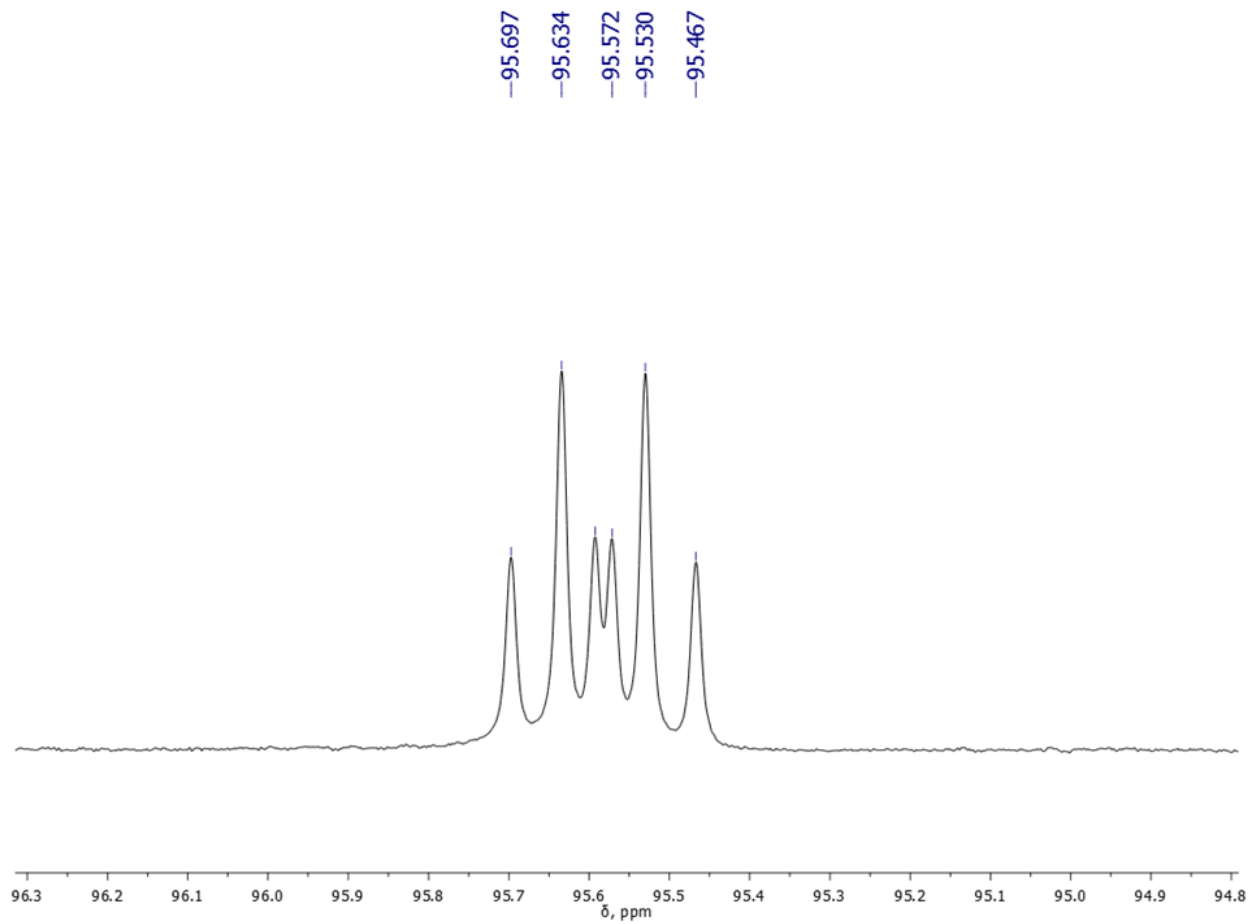

**Figure S2:**  $^{19}\text{F}$  NMR spectrum for  $(\text{PNP})\text{Rh}=\text{CF}_2$  in  $\text{C}_6\text{D}_6$ .

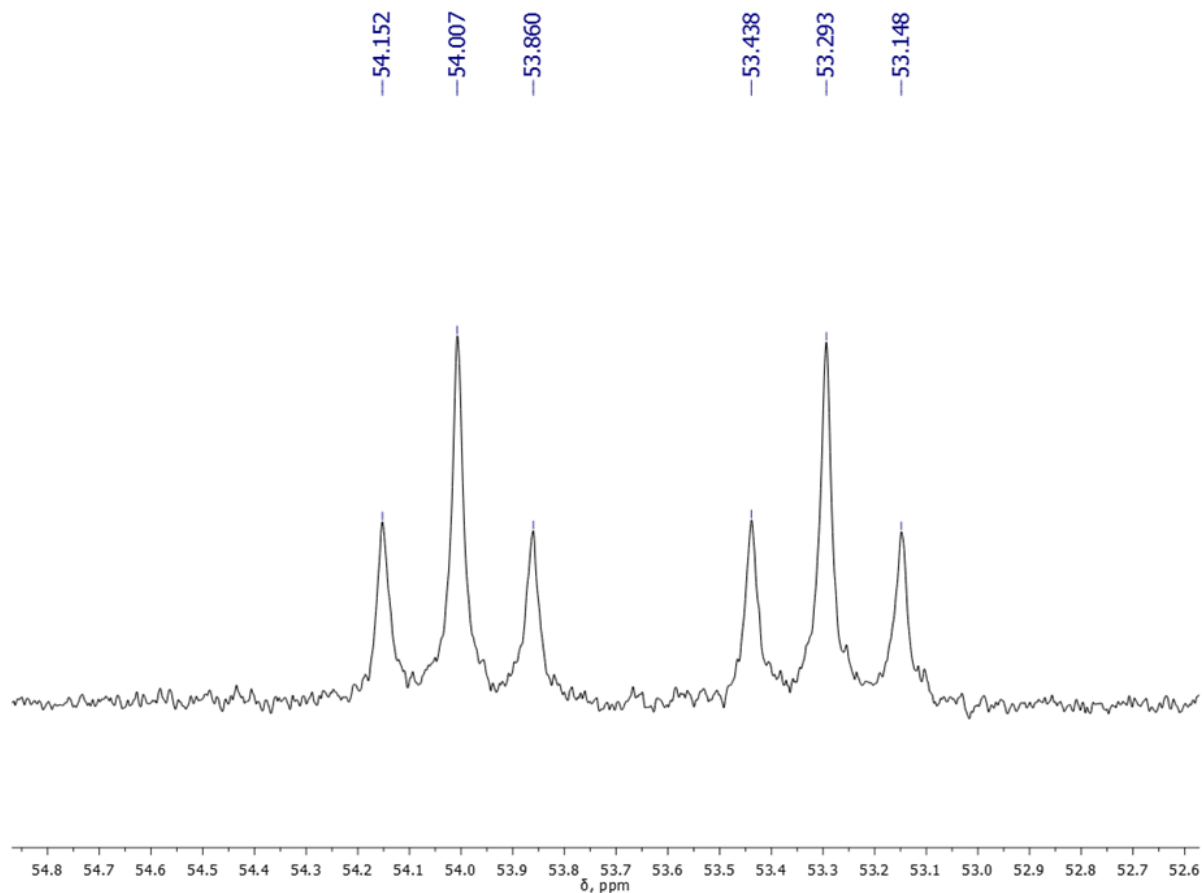

**Figure S3:**  $^{31}\text{P}\{^1\text{H}\}$  NMR spectrum of  $(\text{PNP})\text{Rh}=\text{CF}_2$  in  $\text{C}_6\text{D}_6$ .

**Attempted Hydrolysis of  $(\text{PNP})\text{Rh}=\text{CF}_2$ .** A 20 mg mixture [91%  $(\text{PNP})\text{Rh}(\text{=CF}_2)$ , 5%  $(\text{PNP})\text{Rh}(\text{CO})$ , 4%  $(\text{PNP})\text{Rh}]_2(\mu\text{-N}_2)$ ] was dissolved in  $\text{C}_6\text{D}_6$  and  $\text{H}_2\text{O}$  (10  $\mu\text{L}$ ) was added. The solution was left for 24 h at room temperature. No decomposition of  $(\text{PNP})\text{Rh}(\text{=CF}_2)$  to  $(\text{PNP})\text{Rh}(\text{CO})$  was observed by  $^{31}\text{P}\{^1\text{H}\}$  NMR spectroscopy. Heating the sample overnight at 80  $^\circ\text{C}$  also led to no visible decomposition of  $(\text{PNP})\text{Rh}(\text{=CF}_2)$  to  $(\text{PNP})\text{Rh}(\text{CO})$ , with  $(\text{PNP})\text{Rh}(\text{=CF}_2)$  still accounting for >90% of the reaction mixture by  $^{31}\text{P}\{^1\text{H}\}$  NMR spectroscopy.

**Treatment of  $(\text{PNP})\text{Rh}(\text{CO})$  with  $\text{Me}_3\text{SiCF}_3$  and  $\text{CsF}$ .**  $(\text{PNP})\text{Rh}(\text{CO})$  (28 mg, 0.050 mmol) was dissolved in toluene in a PTFE screw-top vial and treated with  $\text{Me}_3\text{SiCF}_3$  (30  $\mu\text{L}$ ,

0.20 mol) and CsF (16 mg, 0.10 mmol) and heated at 80 °C for 3 days. No reaction was observed to take place.

**Treatment of (PNP)Rh=CF<sub>2</sub> with Me<sub>3</sub>SiCF<sub>3</sub> and CsF.** A 1:1 mixture of (PNP)Rh=CF<sub>2</sub> and (PNP)Rh(CO) (28 mg, 0.050 [Rh] (0.025 mmol per species)) was dissolved in toluene in a PTFE screw-top vial and treated with Me<sub>3</sub>SiCF<sub>3</sub> (30 μL, 0.20 mol) and CsF (16 mg, 0.10 mmol) and heated at 80 °C for 3 days. Analysis by <sup>31</sup>P{<sup>1</sup>H} NMR spectroscopy using (PNP)Rh(CO) as an internal integration standard showed that no reaction had occurred.

**Treatment of 1,2-dibromo-tetrafluoroethane with Zinc.** Zinc (10 mg, 0.15 mmol) was added to a J. Young tube with 600 μL of THF. 1,2-dibromo-tetrafluoroethane (12 μL, 0.10 mmol) was added to the solution. Bubbles could be seen indicating the formation of tetrafluoroethylene upon mixing the heterogeneous mixture. <sup>19</sup>F NMR spectroscopy was used to observe tetrafluoroethylene as a singlet resonating at -133.67 ppm in THF.

**Observation of tetrafluoroethylene in C<sub>6</sub>D<sub>6</sub>.** Zinc (10 mg, 0.15 mmol) was added to a J. Young tube with 600 μL of THF. 1,2-dibromo-tetrafluoroethane (12 μL, 0.10 mmol) was added to the solution. The solution was then frozen in liquid nitrogen and the headspace evacuated under vacuum. The solution was thawed and shaken. Bubbles could be seen forming around the solid zinc particles. After 20 minutes, the produced tetrafluoroethylene was vacuum transferred to another J. Young tube containing 600 μL of C<sub>6</sub>D<sub>6</sub>. <sup>19</sup>F NMR spectroscopy was used to observe tetrafluoroethylene as a singlet resonating at -132.48 ppm in C<sub>6</sub>D<sub>6</sub>.

**Treatment of Me<sub>3</sub>SiCF<sub>3</sub> with CsF in C<sub>6</sub>D<sub>6</sub>.** CsF (25 mg, 0.14 mmol) was added to a J. Young tube containing C<sub>6</sub>D<sub>6</sub>. Me<sub>3</sub>SiCF<sub>3</sub> (50 μL, 0.39 mmol) was added to the J. Young tube and the solution was heated at 80 °C for 1 h. <sup>19</sup>F NMR spectroscopy showed the formation of



tetrafluoroethylene. The reaction was heated at 80 °C for 3 d.  $^{19}\text{F}$  NMR spectroscopy showed that tetrafluoroethylene ( $\delta = -132.63$  ppm) and  $\text{Me}_3\text{SiF}$  ( $\delta = -158.00$ ) were the two major products.

**Synthesis of (PNP)Rh(CF<sub>2</sub>=CF<sub>2</sub>).** Method 1. (PNP)Rh(TBE) (300 mg, 0.49 mmol) was dissolved in THF with powdered zinc (240 mg, 3.67 mmol) in a Schlenk flask. The mixture is heated to 50 °C and a solution of 1,2-dibromo-tetrafluoroethane (290  $\mu\text{L}$ , 2.42 mmol) is added dropwise. The solution immediately starts to bubble with the formation of tetrafluoroethylene. The reaction was heated overnight and the volatiles were removed under vacuum in the morning. The product was extracted with toluene and filtered through a plug of silica and Celite. The volatiles were removed again and the product was extracted with pentane and filtered through Celite. The volatiles were removed and the product was isolated as a light orange solid (138 mg, 45% yield). Method 2. An alternative synthesis was performed by dissolving (PNP)Rh(TBE) (300 mg, 0.49 mmol) in THF in a PTFE screw-cap flask. Powdered zinc (240 mg, 3.67 mmol) was added to another flask in THF, and 1,2-dibromo-tetrafluoroethane (290  $\mu\text{L}$ , 2.42 mmol) was added dropwise. After 30 minutes of stirring the 1,2-dibromo-tetrafluoroethane over zinc at 50 °C, the produced tetrafluoroethylene was vacuum transferred to the first flask containing (PNP)Rh(TBE). The reaction was stirred overnight at 50 °C and the volatiles were removed under vacuum in the morning. The product was filtered through silica and Celite in THF and washed with pentane to yield the product as a light orange solid (197 mg, 64% yield).  $^1\text{H}$  NMR ( $\text{C}_6\text{D}_6$ ):  $\delta$  7.45 (d,  $J = 8.5$  Hz, 2H, Ar-*H*), 6.81 (br, 2H, Ar-*H*), 6.75 (d,  $J = 8.5$  Hz, 2H, Ar-*H*), 2.30 (br, 4H, PCHMe<sub>2</sub>), 2.13 (s, 6H, Ar-Me), 1.30 (br, 12H, PCHMe<sub>2</sub>), 0.96 (overlapping dt (app. q),  $J = 7$  Hz, 12H, PCHMe<sub>2</sub>).  $^{31}\text{P}\{^1\text{H}\}$  NMR ( $\text{C}_6\text{D}_6$ ): 52.3 (dqui.,  $J_{\text{Rh-P}} = 137$  Hz,  $J_{\text{F-P}} = 23$  Hz);  $^{19}\text{F}$  NMR ( $\text{C}_6\text{D}_6$ ): 100.7 (br);  $^{13}\text{C}\{^1\text{H}\}$  NMR ( $\text{CDCl}_3$ ): 161.5 (dvt,  $J_{\text{C-P}} = 11$  Hz,  $J_{\text{C-Rh}} = 2$  Hz, C-

N), 132.3 (s, *Ar*), 131.8 (s, *Ar*), 126.7 (vt,  $J_{C-P} = 3$  Hz, *Ar*), 119.2 (vt,  $J_{C-P} = 20$  Hz, *Ar*), 115.1 (vt,  $J_{C-P} = 5$  Hz, *Ar*), 111.37 (m,  $C_2F_4$ ), 23.8 (br,  $PCHMe_2$ ), 20.6 (s, *Ar-Me*), 18.5 (br,  $PCHMe_2$ ), 16.7 (s,  $PCHMe_2$ ). Elem. Anal. Found (Calculated) for  $C_{28}H_{40}F_4NP_2Rh$ : C, 53.39 (53.26); H, 6.47 (6.38).

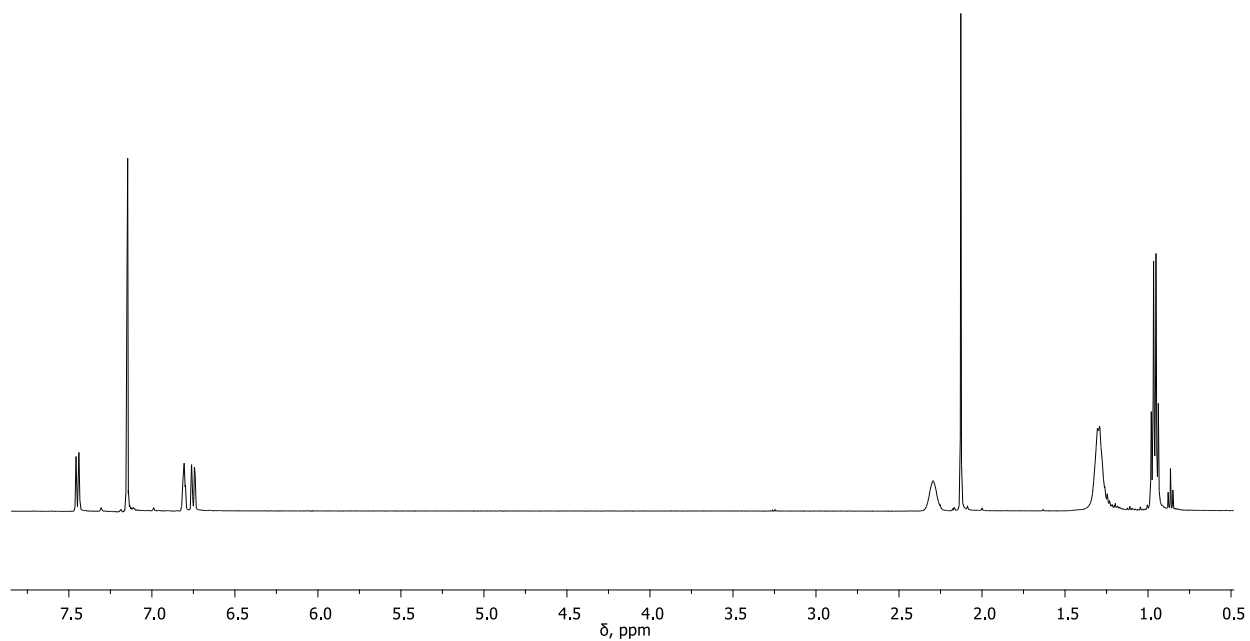

**Figure S4:**  $^1H$  NMR of  $(PNP)Rh(CF_2=CF_2)$  in  $C_6D_6$ . Pentane resonances visible at 0.87 and 1.23 ppm.

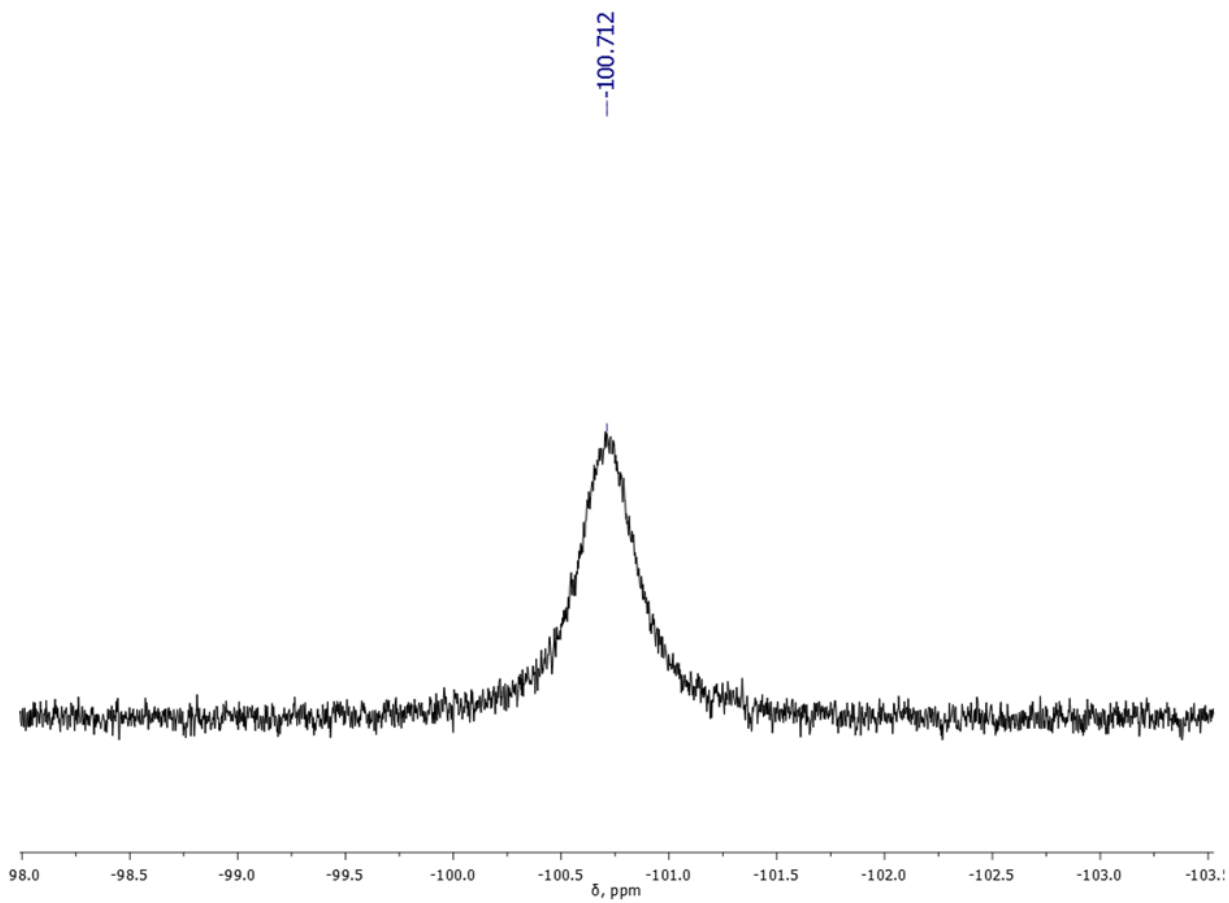

**Figure S5:**  $^{19}\text{F}$  NMR spectrum of  $(\text{PNP})\text{Rh}(\text{CF}_2=\text{CF}_2)$  in  $\text{C}_6\text{D}_6$ .

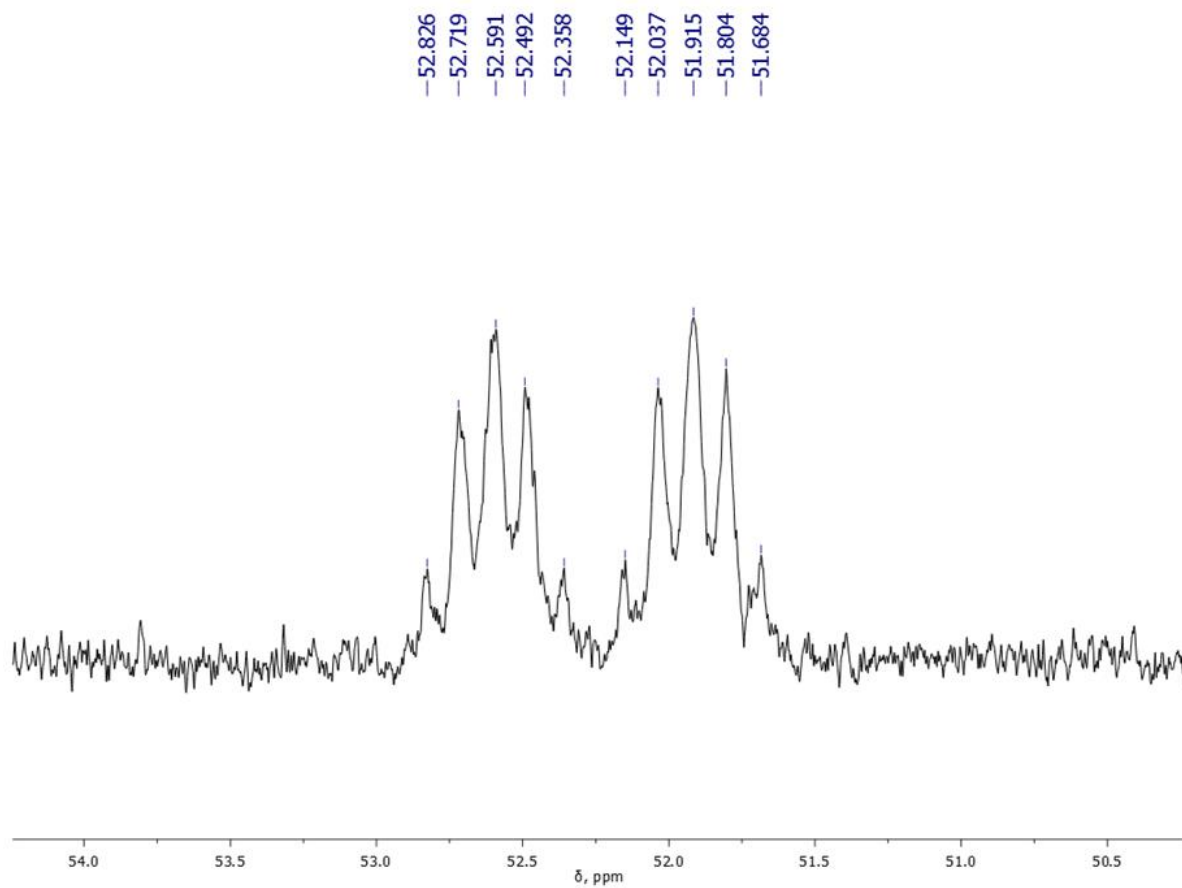

**Figure S6:**  $^{31}\text{P}\{^1\text{H}\}$  NMR spectrum of  $(\text{PNP})\text{Rh}(\text{CF}_2=\text{CF}_2)$  in  $\text{C}_6\text{D}_6$ .

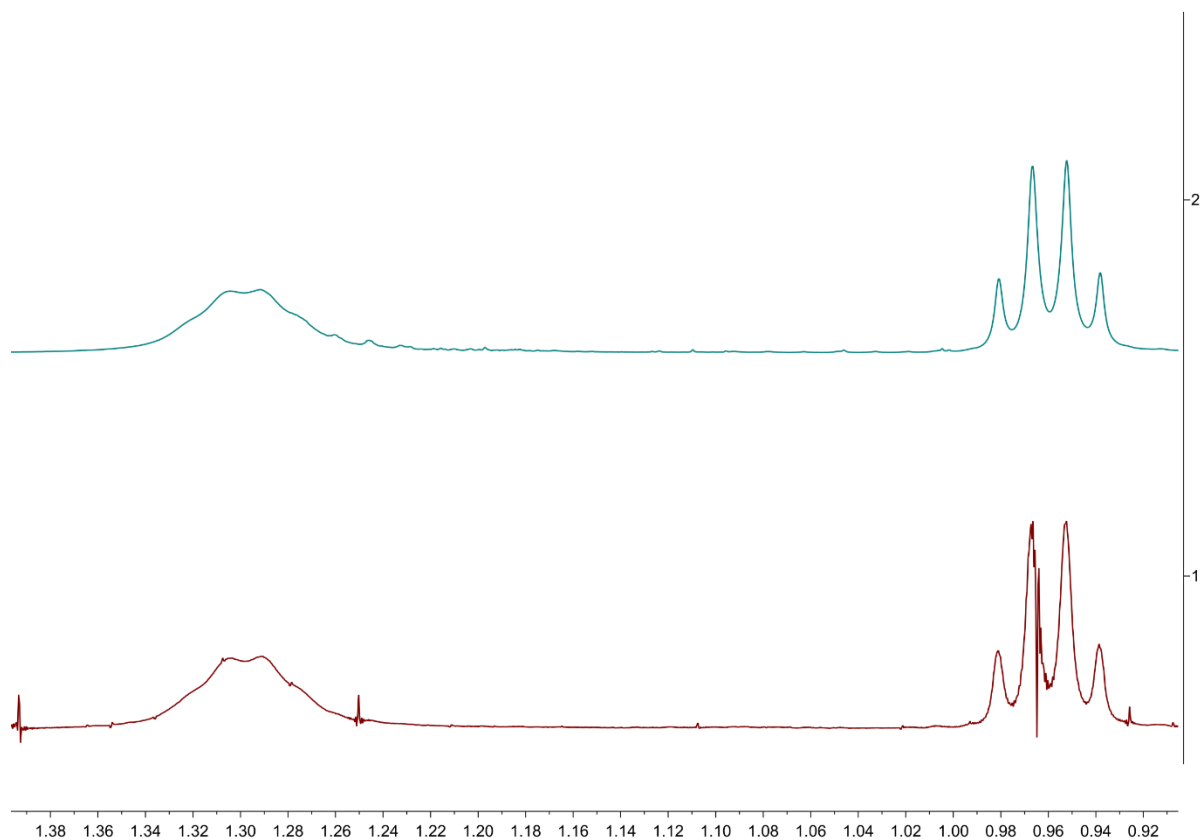

**Figure S7:**  $^1\text{H}\{^{19}\text{F}\}$  NMR spectrum of the isopropyl methyl signals of  $(\text{PNP})\text{Rh}(\text{CF}_2=\text{CF}_2)$  in  $\text{C}_6\text{D}_6$  (bottom).  $^1\text{H}$  NMR spectrum of the isopropyl methyl signals of  $(\text{PNP})\text{Rh}(\text{CF}_2=\text{CF}_2)$  in  $\text{C}_6\text{D}_6$ .

**Treatment of  $(\text{PNP})\text{Rh}(\text{TBE})$  with  $\text{C}_2\text{HF}_5$  in a J. Young tube.**  $(\text{PNP})\text{Rh}(\text{TBE})$  (22 mg, 0.036 mmol) was dissolved in  $\text{C}_6\text{D}_6$  and the solution was degassed and charged with 1 atm of  $\text{C}_2\text{HF}_5$ . The solution was heated at  $80\text{ }^\circ\text{C}$  overnight. Analysis by  $^{31}\text{P}\{^1\text{H}\}$  NMR spectroscopy in the morning showed 52% conversion to  $[(\text{PNP})\text{Rh}]_2(\mu\text{-N}_2)$  and  $(\text{PNP})\text{Rh}(\text{N}_2)$ , 9%  $(\text{PNP})\text{Rh}(\text{CO})$ , 27%  $(\text{PNP})\text{Rh}=\text{C}(\text{F})(\text{CF}_3)$ .

**Synthesis of  $(\text{PNP})\text{Rh}(\text{C}(\text{F})(\text{CF}_3))$ .**  $(\text{PNP})\text{Rh}(\text{TBE})$  (200 mg, 0.32 mmol) was dissolved in benzotrifluoride (5 mL) in a 25 mL PTFE screw top flask, and the solution was degassed under vacuum. A 25 mL PTFE screw top flask was filled with 1 atm of  $\text{C}_2\text{HF}_5$  and

frozen in liquid nitrogen, once the  $C_2HF_5$  (melting point =  $-103\text{ }^\circ C$ ) was frozen in the flask, the volatiles were removed under vacuum to remove dinitrogen from the gas mixture. The  $C_2HF_5$  was freeze-pumped-thawed two more times and then vacuum transferred to the flask containing the (PNP)Rh(TBE) solution. The solution was then heated overnight at  $80\text{ }^\circ C$ . The flask was cooled to room temperature and the volatiles were removed under vacuum. A portion of the resulting greenish blue solid was dissolved in  $C_6D_6$  and analyzed by  $^{31}P\{^1H\}$  NMR, which displayed a mixture composed of 62% (PNP)Rh=C(F)(CF<sub>3</sub>), 1% (PNP)Rh(CO), and 37% (PNP)Rh(TBE). The solid was redissolved in benzotrifluoride and treated with  $C_2HF_5$  following the previously described procedure. The reaction was heated overnight at  $80\text{ }^\circ C$ , and the volatiles were removed under vacuum in the morning. The resulting dark blue solid was dissolved in pentane and filtered through a pad of silica and Celite. The volatiles were removed to yield a blue powder (156 mg, 78% yield >90% pure). Analysis by  $^{31}P\{^1H\}$  NMR spectroscopy determined the mixture to be >90% (PNP)Rh=C(F)(CF<sub>3</sub>), the rest of the mixture was composed of (PNP)Rh(CO). Dissolving the mixture in pentane and placing in a  $-35\text{ }^\circ C$  freezer overnight formed clover-shaped crystals. Analysis of the crystals by  $^{31}P\{^1H\}$  NMR spectroscopy showed the same distribution of products (>90% (PNP)Rh=C(F)(CF<sub>3</sub>) and <10% (PNP)Rh(CO)). Method 2. (PNP)Rh(TBE) (200 mg, 0.32 mmol) was dissolved in benzotrifluoride (5 mL) in a 25 mL PTFE screw top flask, and the solution was degassed under vacuum. A 50 mL PTFE screw top flask was filled with 1 atm of  $C_2HF_5$  and frozen in liquid nitrogen, once the  $C_2HF_5$  (melting point =  $-103\text{ }^\circ C$ ) was frozen in the flask, the volatiles were removed under vacuum to remove dinitrogen from the gas mixture. The  $C_2HF_5$  was freeze-pumped-thawed two more times and then vacuum transferred to a 25 mL PTFE capped flask containing the (PNP)Rh(TBE) solution. The solution was then heated for 24 h at  $80\text{ }^\circ C$ . The flask was cooled to room temperature and an

aliquot of the reaction mixture was transferred to J. Young tube for NMR analysis.  $^{31}\text{P}\{^1\text{H}\}$  NMR spectroscopy showed a mixture containing 25% (PNP)Rh(CO), 52% (PNP)Rh=C(F)(CF<sub>3</sub>), and 13% (PNP)Rh=CF<sub>2</sub>.  $^1\text{H}$  NMR (C<sub>6</sub>D<sub>6</sub>): 7.57 (dvt,  $J = 8.5$  Hz,  $J_{\text{H-P}} = 2$  Hz, 2H, Ar-H), 7.05 (m, 2H, Ar-H), 6.77 (dd,  $J = 9$  Hz,  $J = 1.5$  Hz, 2H, Ar-H), 2.53 (m, 4H, PCHMe<sub>2</sub>), 2.18 (s, 6H, Ar-Me), 1.28 (overlapping dvt (app. q),  $J = 7.5$  Hz, PCHMe<sub>2</sub>), 1.05 (overlapping dvt (app. q),  $J = 7$  Hz, PCHMe<sub>2</sub>);  $^{19}\text{F}$  NMR (C<sub>6</sub>D<sub>6</sub>): 75.6 (br. t,  $J = 39.5$  Hz, 1F, Rh=C(F)(CF<sub>3</sub>)), -74.2 (d,  $J = 11.3$  Hz, 3F, Rh=C(F)(CF<sub>3</sub>));  $^{31}\text{P}\{^1\text{H}\}$  NMR (C<sub>6</sub>D<sub>6</sub>): 55.4 (dd,  $J_{\text{Rh-P}} = 149.3$  Hz,  $J_{\text{F-P}} = 41.0$  Hz);  $^{13}\text{C}\{^1\text{H}\}$  NMR (C<sub>6</sub>D<sub>6</sub>): 225.0 (m, Rh=C), 161.3 (dvt,  $J_{\text{C-P}} = 12$  Hz,  $J_{\text{C-Rh}} = 2$  Hz, C-N), 132.3 (s, Ar-H), 132.1 (s, Ar-H), 126.2 (vt,  $J_{\text{C-P}} = 3$  Hz, Ar), 121.6 (vt,  $J_{\text{C-P}} = 19$  Hz, Ar), 116.8 (vt,  $J_{\text{C-P}} = 5$  Hz, Ar), 25.3 (vt,  $J_{\text{C-P}} = 11$  Hz, PCHMe<sub>2</sub>), 20.5 (s, Ar-Me), 19.4 (vt,  $J_{\text{C-P}} = 3$  Hz, PCHMe<sub>2</sub>), 18.3 (s, PCHMe<sub>2</sub>).

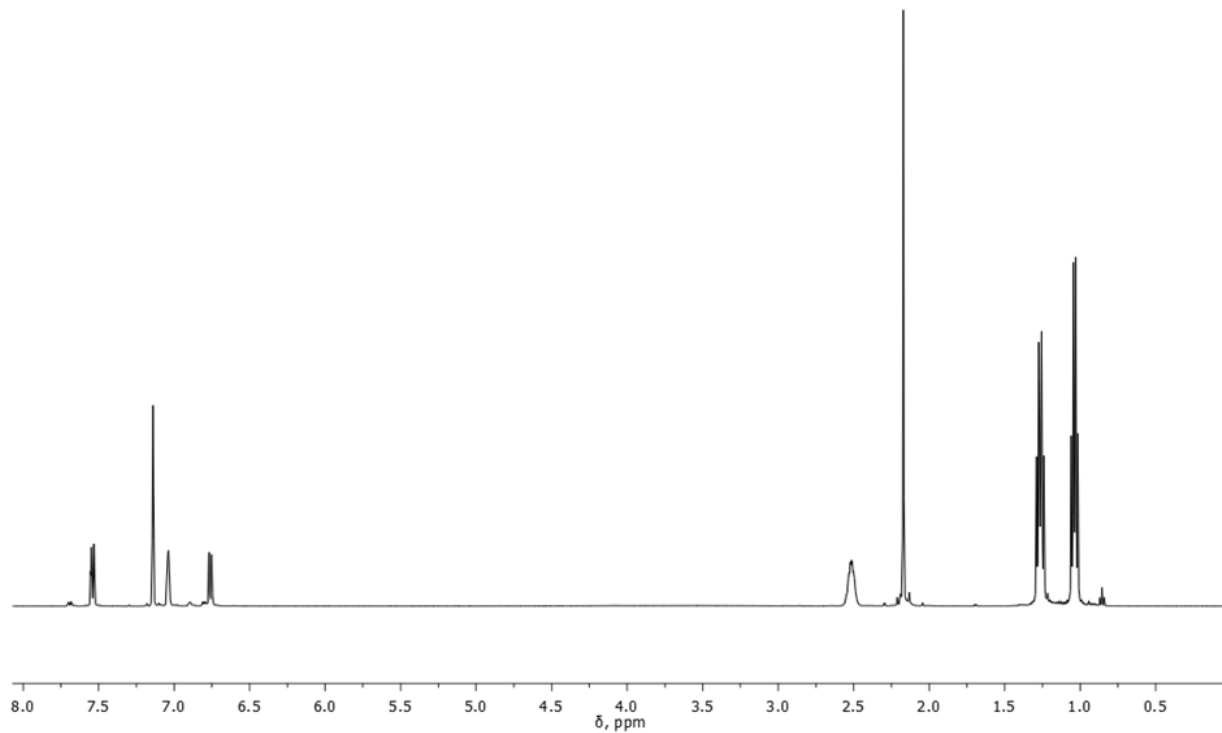

**Figure S8:**  $^1\text{H}$  NMR of  $(\text{PNP})\text{Rh}=\text{C}(\text{F})(\text{CF}_3)$  in  $\text{C}_6\text{D}_6$  with about 7%  $(\text{PNP})\text{Rh}(\text{CO})$ . Pentane resonances are also visible at 0.87 and 1.23 ppm.



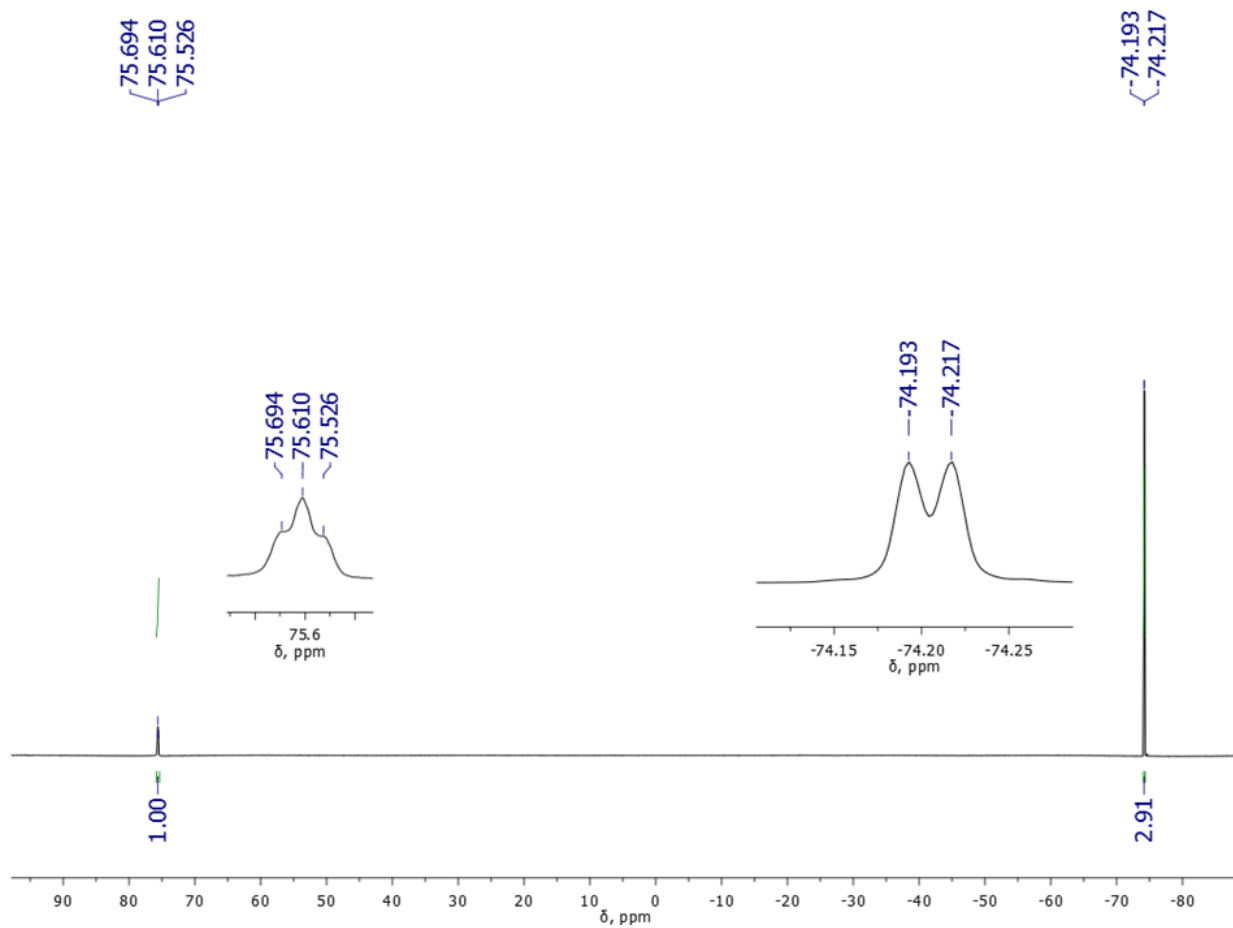

**Figure S9:**  $^{19}\text{F}$  NMR spectrum of  $(\text{PNP})\text{Rh}=\text{C}(\text{F})(\text{CF}_3)$  in  $\text{C}_6\text{D}_6$ .

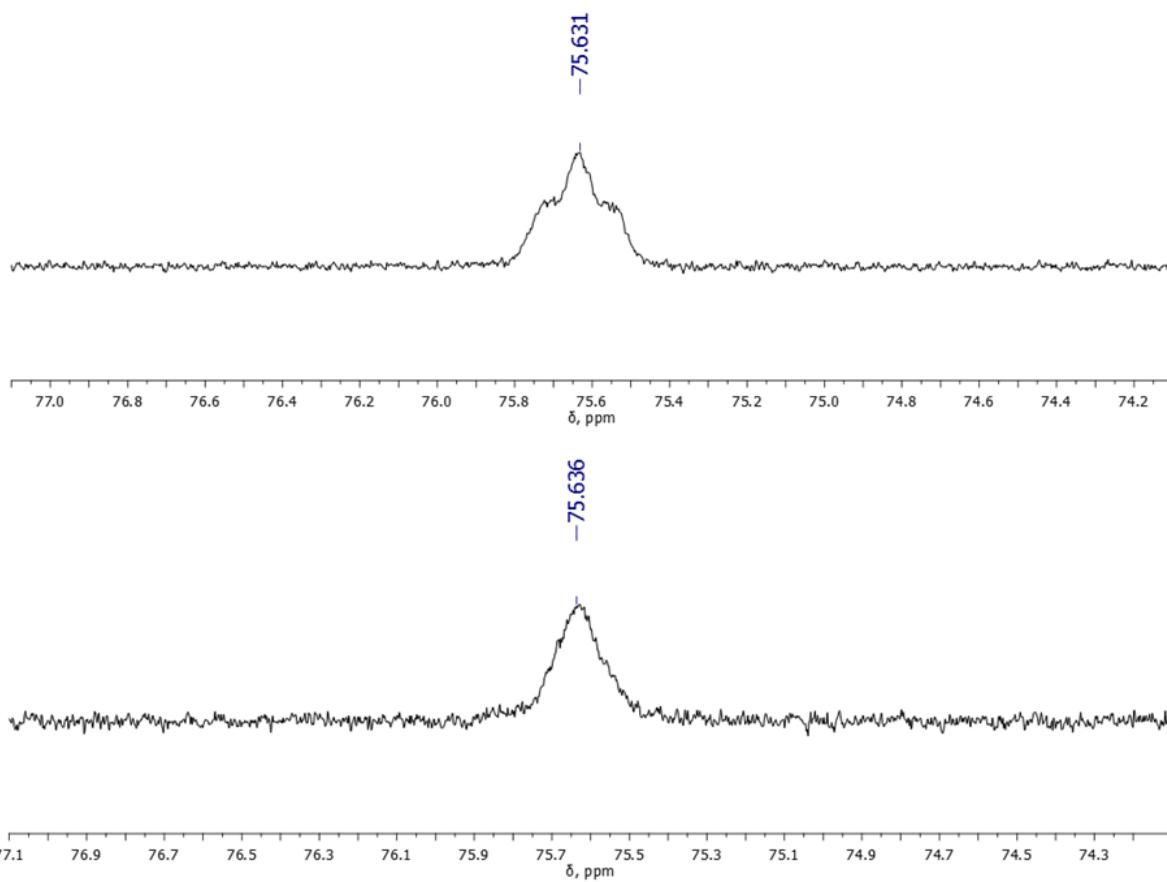

**Figure S10:**  $^{19}\text{F}\{^{31}\text{P}\}$  NMR spectrum of  $(\text{PNP})\text{Rh}=\text{C}(\text{F})(\text{CF}_3)$  in  $\text{C}_6\text{D}_6$  (below)  $^{19}\text{F}$  NMR spectrum of  $(\text{PNP})\text{Rh}=\text{C}(\text{F})(\text{CF}_3)$  in  $\text{C}_6\text{D}_6$ .

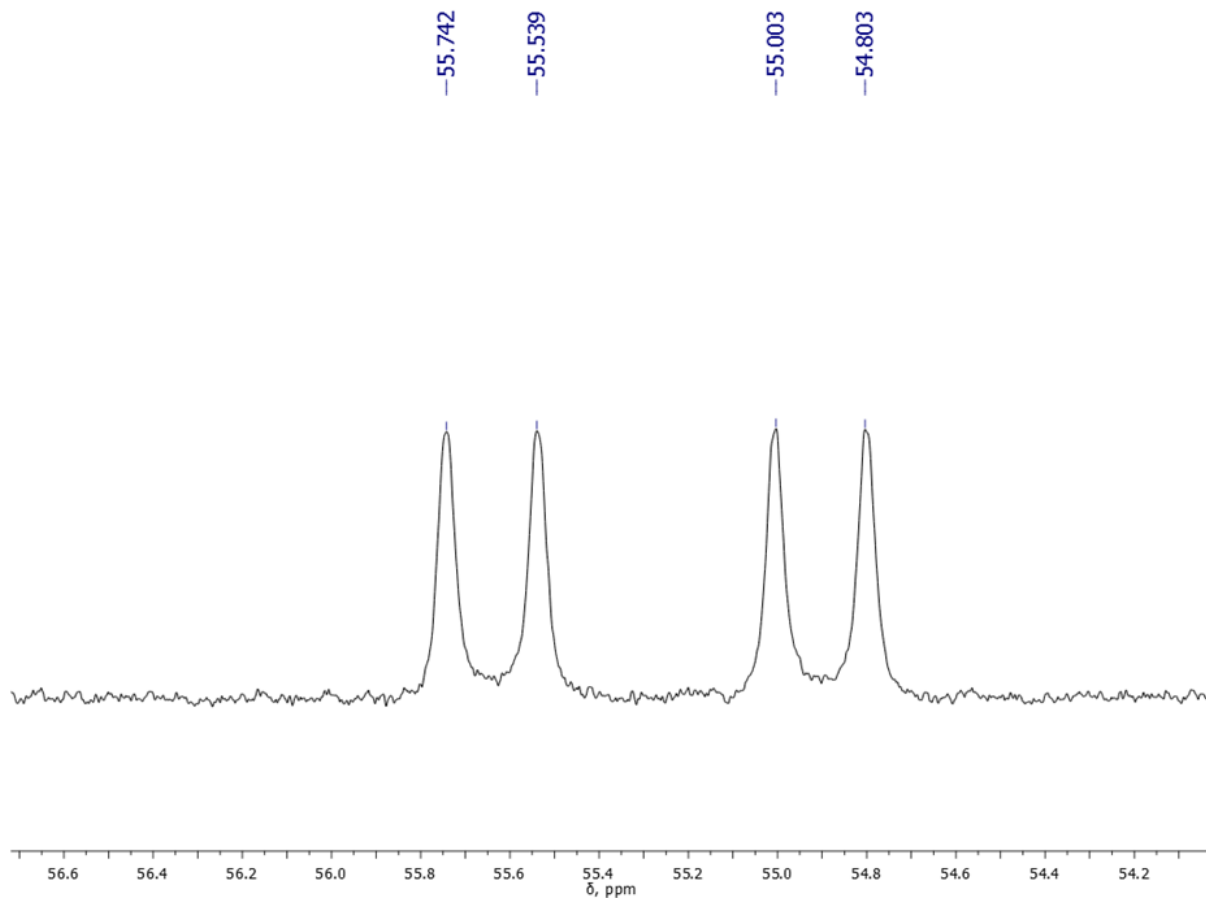

**Figure S11:**  $^{31}\text{P}\{^1\text{H}\}$  NMR spectrum of  $(\text{PNP})\text{Rh}=\text{CF}(\text{CF}_3)$  in  $\text{C}_6\text{D}_6$ .

**Synthesis of  $[(\text{PNP})\text{Rh}\equiv\text{CF}][\text{CHB}_{11}\text{Cl}_{11}]$ .**  $[\text{Ph}_3\text{C}][\text{CHB}_{11}\text{Cl}_{11}]$  (31.6 mg, 0.041 mmol) was dissolved in about 1 mL of PhF in a flask followed by the addition of  $\text{Et}_3\text{SiH}$  (8.0  $\mu\text{L}$ , 0.049 mmol). The yellow solution changed to colorless within minutes.  $(\text{PNP})\text{Rh}(=\text{CF}_2)$  (24 mg, 0.041 mmol) was added to the reaction mixture. The solution changed to green/blue immediately. The bluish solid was precipitated out by adding excess pentane to the solution. The supernatant was decanted. The solid was washed with pentane (3x3 mL) and dried under vacuum. Yield, 27 mg, 61%. The X-ray quality crystals were obtained by carefully laying pentane to 1,2-difluorobenzene solution of the title compound at room temperature.  $^1\text{H}$  NMR ( $\text{C}_6\text{D}_6/1,2$ -difluorobenzene, 1,2-difluorobenzene was added to increase the solubility and it overlapped with

the aromatic resonances of the title compound. Only aliphatic region was reported):  $\delta$  2.66 (br, 1H,  $\text{CHB}_{11}\text{Cl}_{11}$ ), 2.41 (m, 4H,  $\text{CHMe}_2$ ), 2.18 (s, 6H, Ar- $\text{CH}_3$ ), 1.03 (app. q,  $J = 11$  Hz, 12H,  $\text{CHMe}_2$ ), 0.90 (app. q,  $J = 11$  Hz, 12H,  $\text{CHMe}_2$ ).  $^{31}\text{P}\{^1\text{H}\}$  NMR ( $\text{C}_6\text{D}_6/1,2\text{-difluorobenzene}$ ):  $\delta$  89.3 (dd,  $J_{\text{Rh-P}} = 106$  Hz,  $J_{\text{F-P}} = 14$  Hz).  $^{19}\text{F}$  NMR:  $\delta$  66.2 (dt,  $J_{\text{Rh-F}} = 136$  Hz,  $J_{\text{P-F}} = 14$  Hz).  $^{13}\text{C}\{^1\text{H}, ^{31}\text{P}\}$  NMR ( $\text{C}_6\text{D}_5\text{Br}/1,2\text{-difluorobenzene}$ ):  $\delta$  160.1(s), 134.1(s), 132.5 (s), 116.2 (s) 47.3 (broad s, C-H) 26.3 (s,  $\text{CHMe}_2$ ), 20.0(s, Ar- $\text{CH}_3$ ), 18.7 (s,  $\text{CHMe}_2$ ), 17.6 (s,  $\text{CHMe}_2$ ). (2 aromatic signals are overlapping with solvent). Elem. Anal. Found (Calculated) for  $\text{C}_{28}\text{H}_{41}\text{B}_{11}\text{Cl}_{11}\text{FNP}_2\text{Rh}$ : C, 31.02 (31.01); H, 3.80 (3.81).

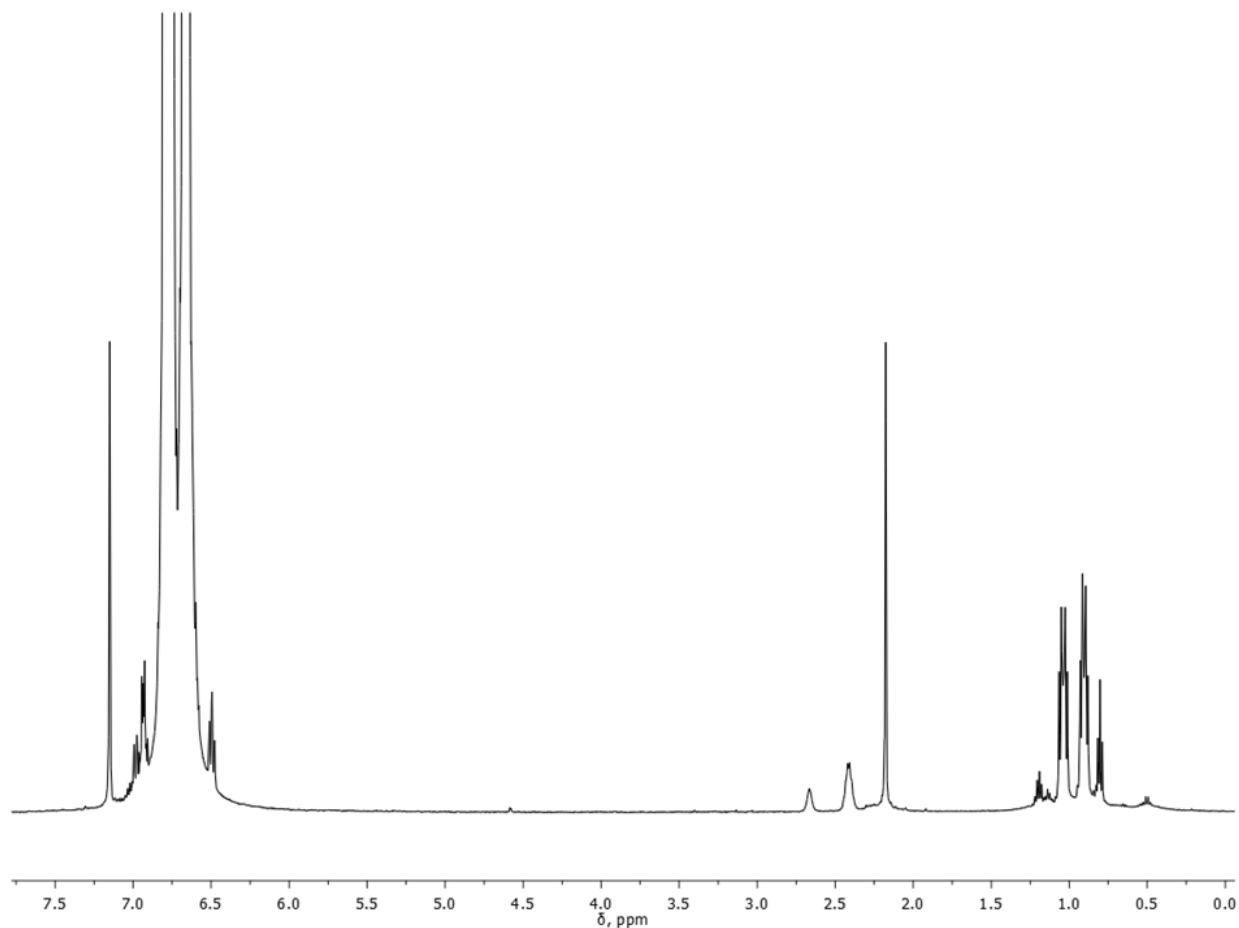

**Figure S12:**  $^1\text{H}$  NMR spectrum of  $[(\text{PNP})\text{Rh}\equiv\text{CF}][\text{CHB}_{11}\text{Cl}_{11}]$  in  $\text{C}_6\text{D}_6/1,2\text{-difluorobenzene}$ . Pentane resonances are visible at 0.79 and 1.19 ppm.

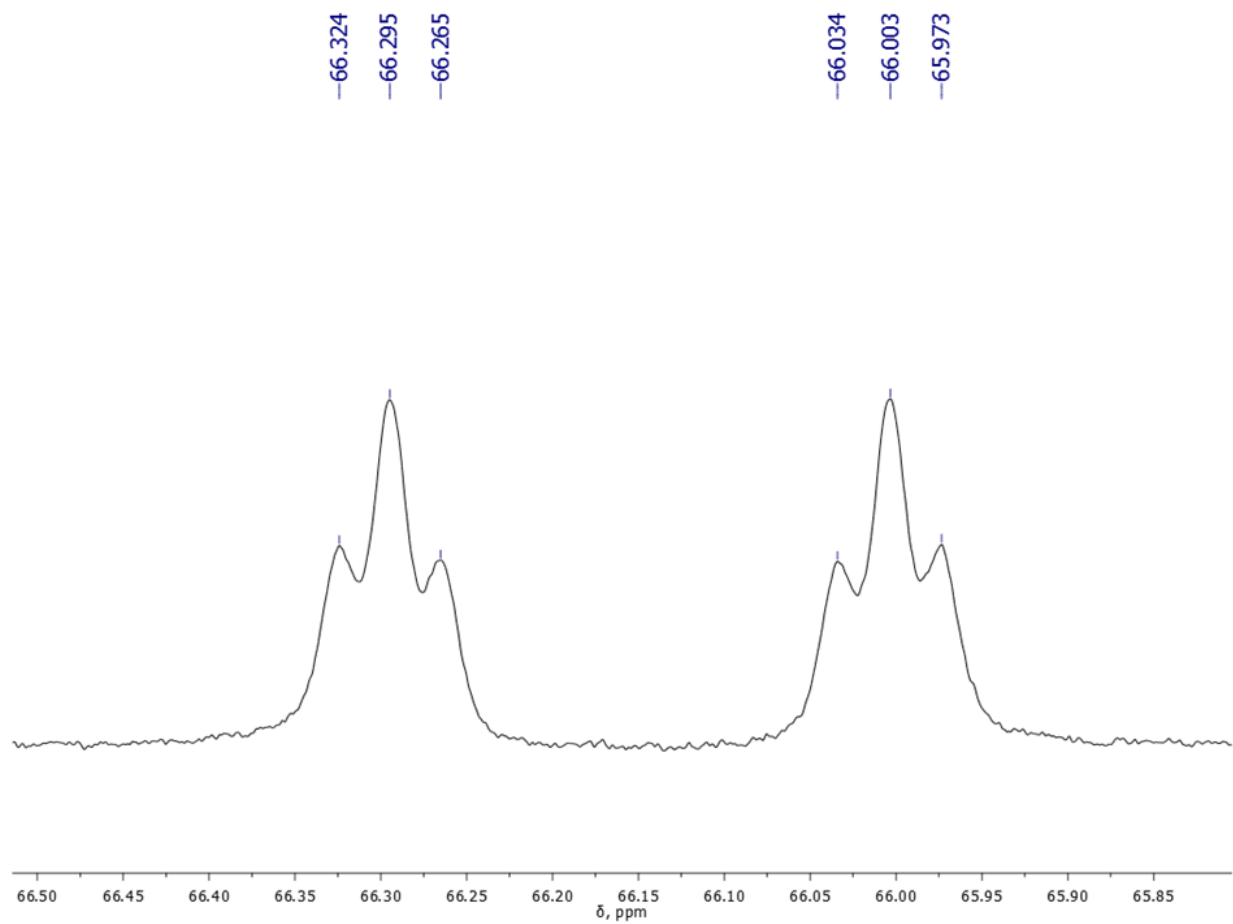

**Figure S13:**  $^{19}\text{F}$  NMR spectrum of  $[(\text{PNP})\text{Rh}\equiv\text{CF}][\text{CHB}_{11}\text{Cl}_{11}]$  in  $\text{C}_6\text{D}_6/1,2\text{-difluorobenzene}$ .

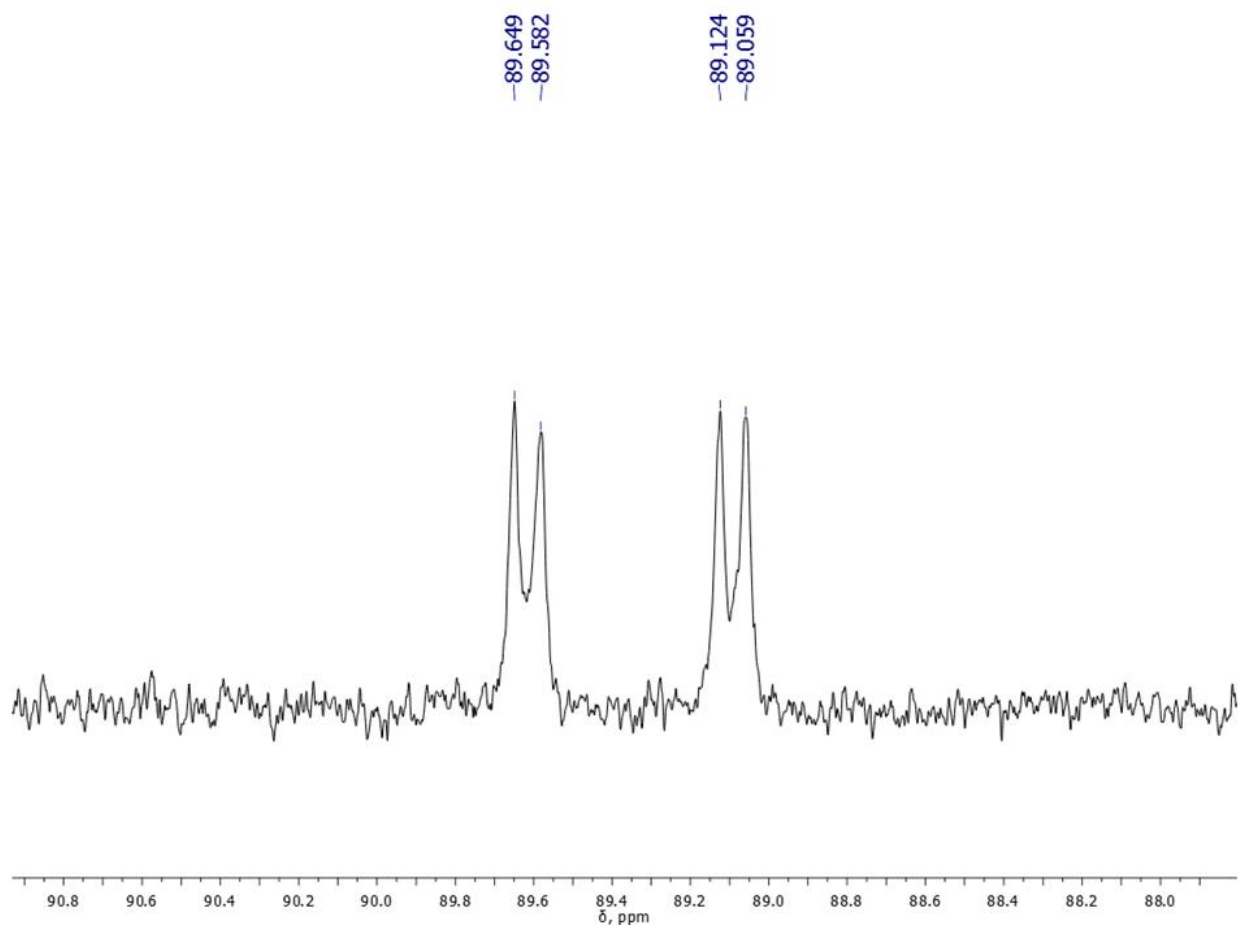

**Figure S14:**  $^{31}\text{P}\{^1\text{H}\}$  NMR spectrum of  $[(\text{PNP})\text{Rh}\equiv\text{CF}][\text{CHB}_{11}\text{Cl}_{11}]$  in  $\text{C}_6\text{D}_6/1,2$ -difluorobenzene.

**Determination of  $J_{\text{C-F}}$  by observation of  $^{13}\text{C}$  satellites in  $^{19}\text{F}$  NMR for  $[(\text{PNP})\text{Rh}\equiv\text{CF}]^+$ .** In an oven dried, argon cooled J. Young Tube  $[\text{Ph}_3\text{C}][\text{BArF}_{20}]$  (19 mg, 0.029 mmol) was dissolved in  $\sim 0.1$  mL of  $\text{C}_6\text{H}_5\text{F}$ . To the solution  $\text{Et}_3\text{SiH}$  (6 mg, 0.052 mmol) was added and then mixed until the solution became a very pale brown (almost colorless). After five minutes,  $(\text{PNP})\text{Rh}=\text{CF}_2$  (17 mg, 0.029 mmol) was added and the NMR tube walls were rinsed with  $\sim 0.3$  mL of  $\text{C}_6\text{H}_5\text{F}$  and  $\sim 0.2$  mL of  $\text{C}_6\text{D}_6$ . Upon mixing the color immediately changed from a dark red to a dark blue. An overnight  $^{19}\text{F}$  NMR collection was sufficient to show  $^{13}\text{C}$  satellites (shown below).  $^{19}\text{F}$  NMR ( $\text{C}_6\text{H}_5\text{F}/\text{C}_6\text{D}_6$ ): 65.1(dt,  $J_{\text{Rh-F}} = 136$  Hz,  $J_{\text{P-F}} = 12$  Hz,  $J_{\text{C-F}} = 470$  Hz)

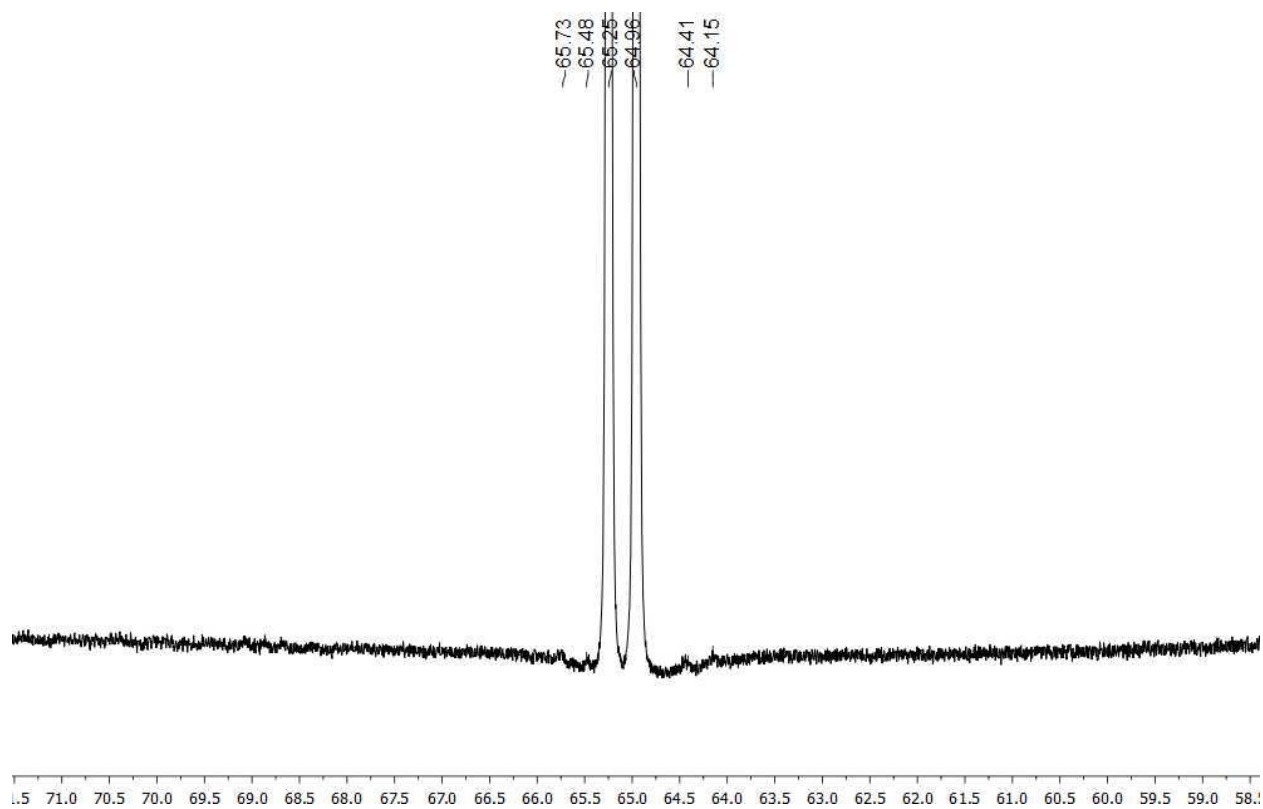

**Figure S15:**  $^{19}\text{F}$  NMR spectrum of  $[(\text{PNP})\text{Rh}\equiv\text{CF}][\text{BArF}_{20}]$  processed with a default line broadening factor of 0.88.  $^{13}\text{C}$  NMR satellites are visible.

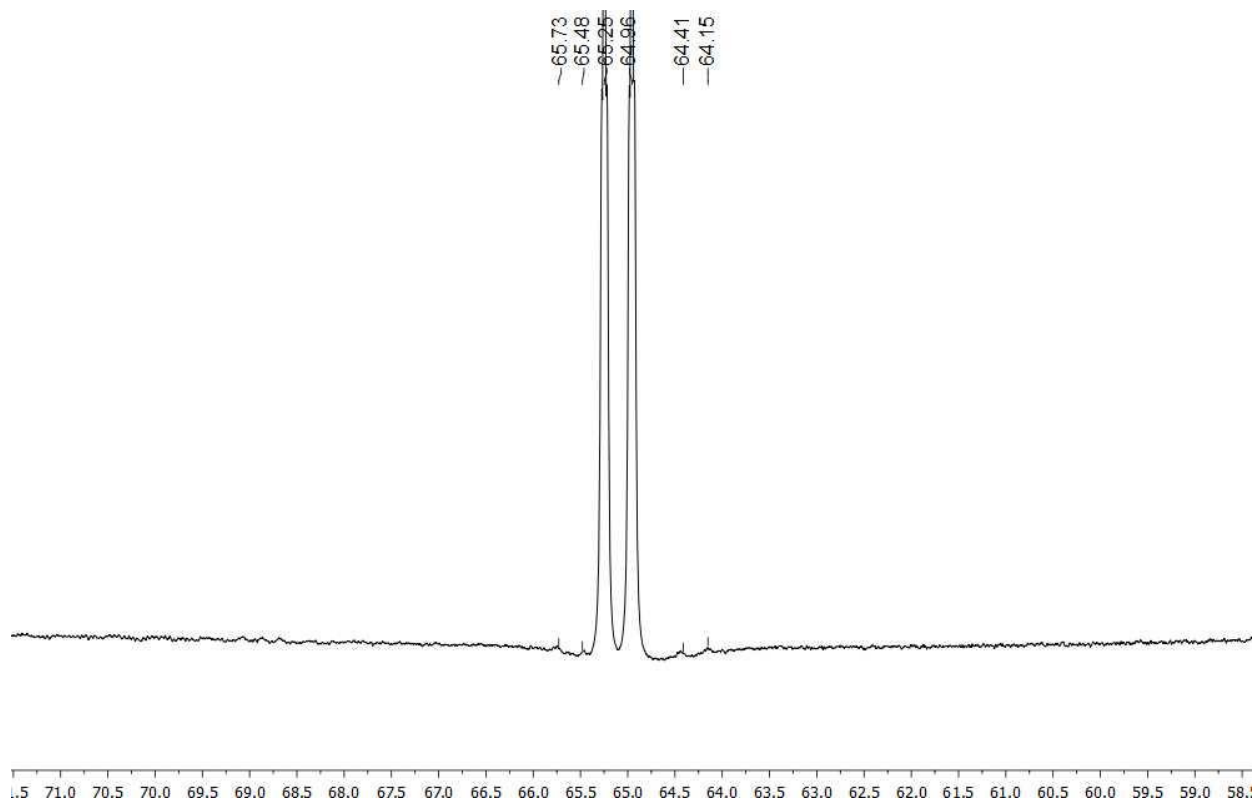

**Figure S16:**  $^{19}\text{F}$  NMR of  $[(\text{PNP})\text{Rh}\equiv\text{CF}][\text{BARf}_{20}]$  processed with a line broadening factor of 3.0 to improve the signal to noise ratio to better observe the  $^{13}\text{C}$  satellites.

**Treatment of  $(\text{PNP})\text{Rh}(\text{C}_2\text{F}_4)$  with  $[(\text{Et}_3\text{Si})_2(\text{SO}_3\text{CF}_3)][\text{HCB}_{11}\text{Cl}_{11}]$ .**

$[(\text{Et}_3\text{Si})_2(\text{SO}_3\text{CF}_3)][\text{HCB}_{11}\text{Cl}_{11}]$  (38 mg, 0.042 mmol) was dissolved in fluorobenzene in a vial and  $(\text{PNP})\text{Rh}(\text{C}_2\text{F}_4)$  (27 mg, 0.042 mmol) was added to the reaction mixture, which immediately turned blue. The mixture was stirred overnight and transferred to a J. Young tube. Analysis by  $^{19}\text{F}$  NMR spectroscopy showed  $\text{Et}_3\text{SiOTf}$  and  $\text{Et}_3\text{SiF}$ , while analysis by  $^{31}\text{P}\{^1\text{H}\}$  NMR showed no signals. The reaction mixture was transferred back to a flask, and the volatiles were removed under vacuum. The dark blue solid was then redissolved in fluorobenzene and precipitated with pentane. A slightly blue-tinted clear solution was decanted from the blue solid, and the solid was dried under vacuum to yield 25 mg of a blue solid. The solid was dissolved in 0.5 mL of toluene and 0.2 mL of *ortho*-dichlorobenzene and transferred to a J. Young tube. Analysis by  $^{19}\text{F}$  NMR spectroscopy showed a broad signal at -84.5 ppm. Upon cooling the solution to -30 °C this signal



split into two other signals at -83.2 and -85.8 ppm, and other broad signals appeared at -97.6 and -106.1 ppm. Analysis by  $^{31}\text{P}\{^1\text{H}\}$  NMR spectroscopy showed one broad peak at 55 ppm, but upon cooling the sample to -30 °C the signal split into two broad peaks around 60 ppm.

The mixture was warmed to room temperature and CsF (10 mg, 0.66 mmol) was added to the J. Young tube and rotated overnight. By morning the solution had turned from dark blue to a brownish green. Analysis by  $^{19}\text{F}$  NMR spectroscopy showed that 98% of the visible signals had been converted back to (PNP)Rh(C<sub>2</sub>F<sub>4</sub>) (as judged by integration versus a residual FPh peak). The solution in the J. Young tube was transferred to a vial and pentane was added to precipitate any cationic species and the solution was filtered through celite to form an orange filtrate.  $^1\text{H}$ ,  $^{31}\text{P}\{^1\text{H}\}$ , and  $^{19}\text{F}$  NMR spectroscopy all confirmed that (PNP)Rh(C<sub>2</sub>F<sub>4</sub>) was the resulting product.

**Treatment of (PNP)Rh=C(F)(CF<sub>3</sub>) with [(Et<sub>3</sub>Si)<sub>2</sub>(SO<sub>3</sub>CF<sub>3</sub>)](HCB<sub>11</sub>Cl<sub>11</sub>).** A mixture of (PNP)Rh=C(F)(CF<sub>3</sub>) and (PNP)Rh(CO) (21 mg, 9:1) was dissolved in fluorobenzene in a J. Young tube and treated with [(Et<sub>3</sub>Si)<sub>2</sub>(SO<sub>3</sub>CF<sub>3</sub>)](HCB<sub>11</sub>Cl<sub>11</sub>) (30 mg, 0.033 mmol). Analysis by  $^{19}\text{F}$  NMR spectroscopy after 2 h at RT showed Et<sub>3</sub>SiOTf and Et<sub>3</sub>SiF. Analysis by  $^{31}\text{P}\{^1\text{H}\}$  NMR showed a broad doublet at about 60 ppm. The reaction was left overnight and in the morning the volatiles were removed and the resulting solid was washed with pentane. The resulting solid was dissolved in C<sub>6</sub>D<sub>5</sub>Br for NMR analysis. Analysis by  $^{31}\text{P}\{^1\text{H}\}$  NMR spectroscopy showed a broad doublet at 60.3 ppm (d,  $J = 148$  Hz) as the major signal. Analysis by  $^{19}\text{F}$  NMR spectroscopy showed a singlet at -71.8 ppm as the major signal. The  $^1\text{H}$  NMR spectrum showed broad aliphatic peaks and no characteristic signals. This mixture was transferred to a 10 mL Schlenk flask and the volatiles were removed under vacuum. The solid was then dissolved in *ortho*-difluorobenzene and treated with CsF (5 mg, 0.033 mmol) and stirred for 4 days at room

temperature. The volatiles were removed and the resulting solid was dissolved in fluorobenzene and pentane and filtered through Celite. The volatiles were removed and the solid was dissolved in C<sub>6</sub>D<sub>6</sub> for NMR analysis. Analysis by <sup>19</sup>F NMR spectroscopy showed (PNP)Rh=C(F)(CF<sub>3</sub>) as the major fluorine containing product. Analysis by <sup>31</sup>P{<sup>1</sup>H} NMR spectroscopy showed (PNP)Rh(CO), (PNP)Rh=C(F)(CF<sub>3</sub>), and (PNP)Rh(C<sub>6</sub>D<sub>5</sub>)(Br) in a (20:51:28 ratio). <sup>1</sup>H NMR spectroscopy verified the identity and composition of this mixture. Method 2. A mixture of (PNP)Rh=C(F)(CF<sub>3</sub>) and (PNP)Rh(CO) (11 mg, 1:1) was dissolved in fluorobenzene in a J. Young tube and treated with [(Et<sub>3</sub>Si)<sub>2</sub>(SO<sub>3</sub>CF<sub>3</sub>)] [HCB<sub>11</sub>Cl<sub>11</sub>] (15 mg, 0.017 mmol). The reaction was left overnight and in the morning the volatiles were removed and the reaction mixture was dissolved in *ortho*-difluorobenzene and treated with CsF (5 mg, 0.033 mmol). The reaction was stirred for 4 days at room temperature. The volatiles were removed under vacuum and the resulting solid was dissolved in fluorobenzene. Pentane was added to the solution to precipitate any cesium salts, and the supernatant was passed through Celite. The volatiles were removed under vacuum, and the resulting solid was dissolved in C<sub>6</sub>D<sub>6</sub> for NMR analysis. Analysis by <sup>31</sup>P{<sup>1</sup>H} NMR showed (PNP)Rh(CO) and (PNP)Rh=C(F)(CF<sub>3</sub>). <sup>1</sup>H NMR spectroscopy showed that these products were present in a ((PNP)Rh(CO) : (PNP)Rh=C(F)(CF<sub>3</sub>) = 3:1 ratio). <sup>19</sup>F NMR spectroscopy showed (PNP)Rh=C(F)(CF<sub>3</sub>) as the major fluorine-containing product. (PNP)Rh(C<sub>2</sub>F<sub>4</sub>) was not observed.

### III. X-ray Crystallography

**X-Ray data collection, solution, and refinement for (PNP)Rh=CF<sub>2</sub>.** A red block crystal of suitable size (0.30 x 0.21 x 0.15 mm) was selected from a representative sample of crystals of the same habit using an optical microscope, mounted onto a nylon loop and placed in a cold stream of nitrogen. Low temperature (110 K) X-ray data were obtained on a Bruker APEXII CCD based diffractometer (Mo sealed X-ray tube,  $K_{\alpha} = 0.71073 \text{ \AA}$ ). All diffractometer manipulations, including data collection, integration and scaling were carried out using the Bruker APEXII software.<sup>Error! Bookmark not defined.</sup> An absorption correction was applied using SADABS.<sup>Error! Bookmark not defined.</sup> The structure was solved in the  $Pna2_1$  space group using XS<sup>Error! Bookmark not defined.</sup> (incorporated in SHELXTL). The solution was refined by full-matrix least squares on  $F^2$ . No additional symmetry was found using ADDSYMM incorporated into the PLATON program.<sup>Error! Bookmark not defined.</sup> All non-hydrogen atoms were refined with anisotropic thermal parameters. All hydrogen atoms were placed in idealized positions and refined using a riding model. The structure was refined (weighted least squares refinement on  $F^2$ ) and the final least-squares refinement converged to  $R_1 = 0.0357$  ( $I > 2\sigma(I)$ , 6606 data) and  $wR_2 = 0.0751$  ( $F^2$ , 30909 data, 298 parameters).

**X-Ray data collection, solution, and refinement for (PNP)Rh(C<sub>2</sub>F<sub>4</sub>).**A red block crystal of suitable size (0.17 x 0.14 x 0.11 mm) was selected from a representative sample of crystals of the same habit using an optical microscope, mounted onto a nylon loop and placed in a cold stream of nitrogen. Low temperature (110 K) X-ray data were obtained on a Bruker APEXII CCD based diffractometer (Mo sealed X-ray tube,  $K_{\alpha} = 0.71073 \text{ \AA}$ ). All diffractometer manipulations, including data collection, integration and scaling were carried out using the Bruker APEXII software.<sup>4</sup> An absorption correction was applied using SADABS.<sup>5</sup> The structure was solved in the monoclinic  $C2/c$  space group using XS<sup>6</sup> (incorporated in SHELXTL). The

solution was refined by full-matrix least squares on  $F^2$ . No additional symmetry was found using ADDSYMM incorporated into the PLATON program.<sup>7</sup> All non-hydrogen atoms were refined with anisotropic thermal parameters. All hydrogen atoms were placed in idealized positions and refined using a riding model. The structure was refined (weighted least squares refinement on  $F^2$ ) and the final least-squares refinement converged to  $R_1 = 0.0293$  ( $I > 2\sigma(I)$ , 2775 data) and  $wR_2 = 0.0862$  ( $F^2$ , 3031 data, 169 parameters).

**X-Ray data collection, solution, and refinement for [(PNP)Rh≡CF][CHB<sub>11</sub>Cl<sub>11</sub>].** A blue prism (0.20 x 0.17 x 1.00 mm) was selected from a representative sample of crystals of the same habit using an optical microscope, mounted onto a nylon loop and placed in a cold stream of nitrogen (110 K). Low-temperature X-ray data were obtained on a Bruker APEXII CCD based diffractometer (Mo sealed X-ray tube,  $K\alpha = 0.71073 \text{ \AA}$ ). All diffractometer manipulations, including data collection, integration and scaling were carried out using the Bruker APEXII software.<sup>Error! Bookmark not defined.</sup> The space group was determined on the basis of systematic absences and intensity statistics and the structure was solved in the orthorhombic space group  $Pna2_1$  by direct methods using XS<sup>Error! Bookmark not defined.</sup> (incorporated in SHELXTL) and refined by full-matrix least-squares on  $F^2$ . No obvious missed symmetry was reported by PLATON.<sup>Error! Bookmark not defined.</sup> All non-hydrogen atoms were refined with anisotropic thermal parameters. Hydrogen atoms were placed in idealized positions and refined using riding model. The structure was refined (weighted least squares refinement on  $F^2$ ) and the final least-squares refinement converged to  $R_1 = 0.0590$  ( $I > 2\sigma(I)$ , 9513 data) and  $wR_2 = 0.1511$  ( $F^2$ , 10849 data, 511 parameters).

#### IV. Computational Methods

Full molecule DFT studies were performed using the M06 functional<sup>8,9</sup> and the triple- $\zeta$  LACV3P\*\*++ basis set, which used extended core potentials<sup>10-13</sup> on Rh and a 6-311G\*\*++ basis<sup>14-17</sup> for other atoms, as implemented in the Jaguar<sup>18,19</sup> suite of programs. NBO 6.0<sup>20-25</sup> and WBI calculations,<sup>26</sup> as implemented in Jaguar, were performed on each optimized structure. Computed structures were confirmed as energy minima by calculating the vibrational frequencies using second derivative analytic methods, and confirming the absence of imaginary frequencies. DFT calculations on the energetics of rotation barriers in CX<sub>2</sub> and C<sub>2</sub>X<sub>4</sub> ligands (X = F, H) were performed on complexes containing a truncated form of the pincer ligand (see text of manuscript).

Non-default options chosen in Jaguar:

- SCF calculation type: DFT(M06)
- Vibrational frequencies and related properties will be computed from analytic second derivatives
- Molecular symmetry not used
- Energy convergence criterion: 1.00E-05 hartrees
- RMS density matrix convergence criterion: 1.00E-06
- Highest accuracy cutoffs used in SCF

## V. Natural Localized Molecular Orbitals for (PNP)Rh=CH<sub>2</sub>

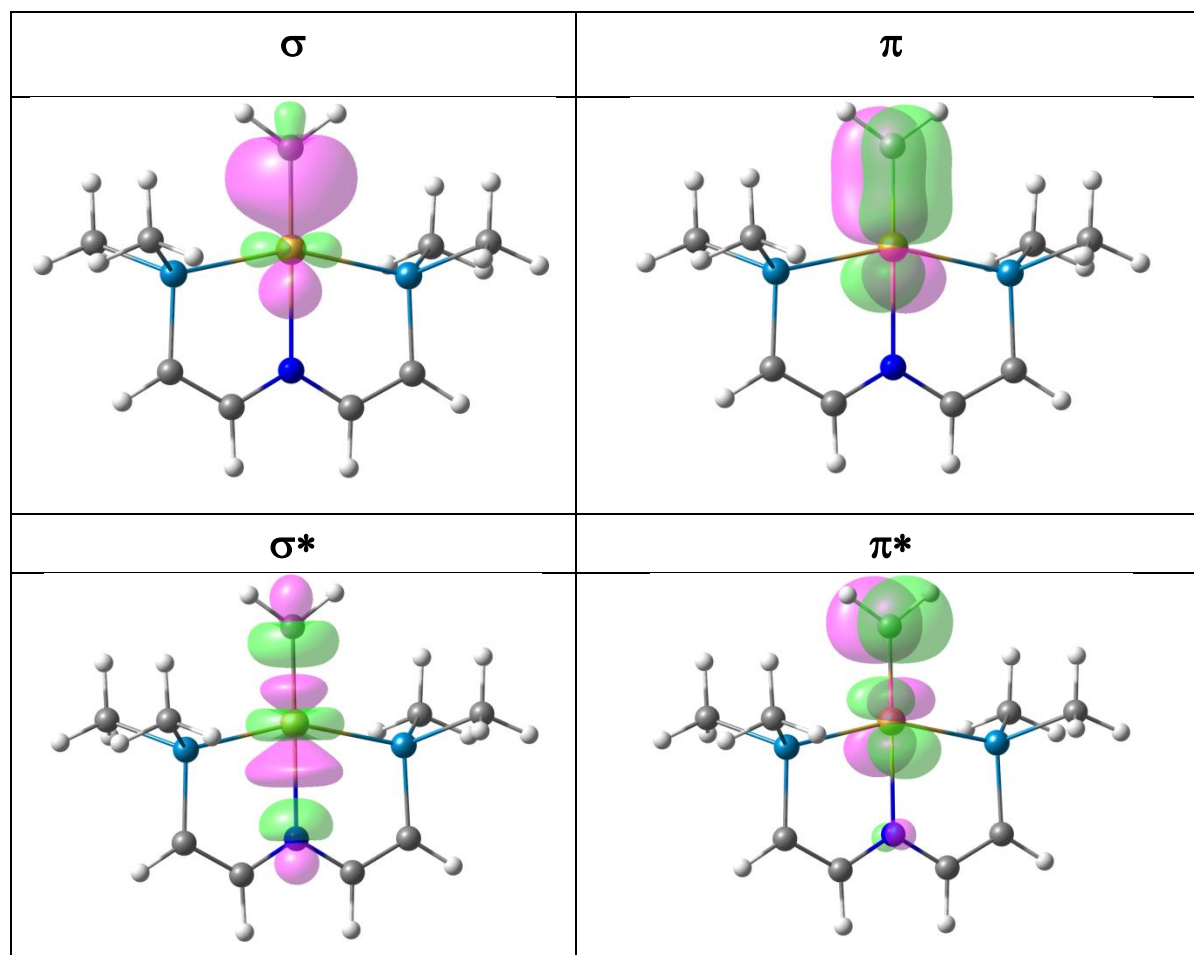

**Figure S17:** NLMOs for the bonding interactions between the CH<sub>2</sub> ligand and the (PNP)Rh fragment. For clarity the P<sup>i</sup>Pr<sub>2</sub> groups have been replaced by PMe<sub>2</sub> groups and the aryl part of the pincer truncated to P-CH=CH-N linkers.

## VI. Cartesian Coordinates

### (PNP)Rh(C<sub>2</sub>H<sub>4</sub>)

76

Rh (PINCER) (C<sub>2</sub>H<sub>4</sub>)

|    |           |           |          |
|----|-----------|-----------|----------|
| Rh | 6.898477  | 10.107683 | 7.593911 |
| P  | 7.154633  | 7.855462  | 7.045758 |
| P  | 7.355532  | 12.325380 | 8.151822 |
| N  | 8.993928  | 10.007310 | 7.618990 |
| C  | 9.609416  | 8.779485  | 7.805715 |
| C  | 8.897287  | 7.597916  | 7.507772 |
| C  | 9.477385  | 6.344166  | 7.690190 |
| H  | 8.902124  | 5.448707  | 7.457819 |
| C  | 10.759125 | 6.190300  | 8.196926 |
| C  | 11.439398 | 7.357987  | 8.548331 |
| H  | 12.427135 | 7.277142  | 8.999947 |
| C  | 10.892744 | 8.611329  | 8.364572 |
| H  | 11.450466 | 9.482741  | 8.689922 |
| C  | 9.728109  | 11.170676 | 7.448714 |
| C  | 11.034486 | 11.214903 | 6.920681 |
| H  | 11.514095 | 10.293797 | 6.607978 |
| C  | 11.702215 | 12.410115 | 6.750333 |
| H  | 12.703322 | 12.395348 | 6.321619 |
| C  | 11.128344 | 13.637992 | 7.086323 |
| C  | 9.826184  | 13.607778 | 7.562836 |
| H  | 9.333265  | 14.554305 | 7.781980 |
| C  | 9.125123  | 12.415237 | 7.730648 |
| C  | 11.380211 | 4.842460  | 8.397102 |
| H  | 11.690266 | 4.691350  | 9.437771 |
| H  | 12.274525 | 4.712699  | 7.776136 |
| H  | 10.682012 | 4.040485  | 8.139727 |
| C  | 11.880162 | 14.919932 | 6.901711 |
| H  | 12.763915 | 14.967445 | 7.549000 |
| H  | 11.254389 | 15.786340 | 7.135621 |
| H  | 12.234233 | 15.034819 | 5.870552 |
| C  | 7.445874  | 6.046646  | 4.853748 |
| H  | 7.296530  | 5.884657  | 3.779583 |
| H  | 6.890251  | 5.265516  | 5.383903 |
| H  | 8.513486  | 5.907996  | 5.059363 |
| C  | 7.004111  | 7.449487  | 5.234354 |
| H  | 5.931394  | 7.564876  | 5.018198 |
| C  | 7.768809  | 8.504064  | 4.445518 |
| H  | 8.841439  | 8.454196  | 4.669973 |
| H  | 7.427431  | 9.516020  | 4.692123 |
| H  | 7.643565  | 8.340882  | 3.368866 |
| C  | 4.779994  | 6.461062  | 7.518728 |
| H  | 4.252368  | 5.677700  | 8.074835 |
| H  | 4.654264  | 6.247532  | 6.452172 |
| H  | 4.274091  | 7.409300  | 7.734953 |
| C  | 6.242645  | 6.505070  | 7.938815 |
| H  | 6.715359  | 5.549472  | 7.670458 |

|   |          |           |           |
|---|----------|-----------|-----------|
| C | 6.383660 | 6.716572  | 9.440069  |
| H | 5.965401 | 7.685197  | 9.738928  |
| H | 7.430440 | 6.698917  | 9.758049  |
| H | 5.846902 | 5.932515  | 9.986637  |
| C | 7.846724 | 11.621591 | 10.764134 |
| H | 8.924165 | 11.570199 | 10.564394 |
| H | 7.417287 | 10.646291 | 10.507617 |
| H | 7.712701 | 11.795899 | 11.837977 |
| C | 7.203017 | 12.743488 | 9.960301  |
| H | 6.119589 | 12.729742 | 10.151944 |
| C | 7.766096 | 14.098531 | 10.353498 |
| H | 7.608985 | 14.273839 | 11.424456 |
| H | 7.298127 | 14.928430 | 9.812901  |
| H | 8.846281 | 14.136243 | 10.171633 |
| C | 5.135899 | 13.939614 | 7.628026  |
| H | 4.698398 | 14.770178 | 7.062284  |
| H | 5.006170 | 14.163199 | 8.692030  |
| H | 4.547269 | 13.044049 | 7.397059  |
| C | 6.597136 | 13.756924 | 7.241710  |
| H | 7.152160 | 14.663115 | 7.523536  |
| C | 6.752000 | 13.533892 | 5.743512  |
| H | 6.250096 | 12.609879 | 5.432409  |
| H | 7.802721 | 13.451642 | 5.449623  |
| H | 6.305335 | 14.365996 | 5.187017  |
| C | 4.859063 | 10.194956 | 6.872945  |
| C | 4.843616 | 10.216190 | 8.266312  |
| H | 4.712661 | 11.109107 | 6.300556  |
| H | 4.656904 | 11.144113 | 8.802921  |
| H | 4.597320 | 9.320846  | 8.834084  |
| H | 4.597488 | 9.288460  | 6.330991  |

**(PNP)Rh(C<sub>2</sub>F<sub>4</sub>)**

76

Rh (PNP) (C<sub>2</sub>F<sub>4</sub>)

|    |           |           |          |
|----|-----------|-----------|----------|
| Rh | 6.872524  | 10.112374 | 7.598432 |
| P  | 7.182854  | 7.813792  | 8.124187 |
| P  | 7.387384  | 12.371228 | 7.060831 |
| N  | 8.969449  | 10.011744 | 7.570254 |
| C  | 9.620699  | 9.030999  | 8.308348 |
| C  | 8.934890  | 7.844671  | 8.628427 |
| C  | 9.556707  | 6.838322  | 9.364590 |
| H  | 9.010583  | 5.926610  | 9.601236 |
| C  | 10.852655 | 6.968947  | 9.842463 |
| C  | 11.505539 | 8.173389  | 9.576829 |
| H  | 12.504564 | 8.332517  | 9.979468 |
| C  | 10.916816 | 9.177558  | 8.835322 |
| H  | 11.454019 | 10.107044 | 8.677717 |
| C  | 9.690459  | 10.924977 | 6.810769 |
| C  | 10.949987 | 10.653760 | 6.245949 |
| H  | 11.399204 | 9.676619  | 6.390089 |
| C  | 11.610746 | 11.596151 | 5.484403 |



|   |           |           |           |
|---|-----------|-----------|-----------|
| H | 12.576969 | 11.340375 | 5.052384  |
| C | 11.070206 | 12.858460 | 5.235196  |
| C | 9.807818  | 13.114026 | 5.751187  |
| H | 9.345505  | 14.074368 | 5.528454  |
| C | 9.113522  | 12.172233 | 6.507818  |
| C | 11.519289 | 5.887800  | 10.635659 |
| H | 11.865906 | 6.257368  | 11.607559 |
| H | 12.397266 | 5.488374  | 10.114611 |
| H | 10.838516 | 5.052199  | 10.821911 |
| C | 11.814859 | 13.869517 | 4.419140  |
| H | 12.744411 | 14.178906 | 4.911134  |
| H | 11.215060 | 14.768984 | 4.252791  |
| H | 12.091890 | 13.468422 | 3.437466  |
| C | 7.627256  | 5.320961  | 6.839646  |
| H | 7.521201  | 4.734439  | 5.919687  |
| H | 7.101931  | 4.780731  | 7.634027  |
| H | 8.694464  | 5.347939  | 7.088814  |
| C | 7.087982  | 6.724651  | 6.618692  |
| H | 6.014985  | 6.679129  | 6.388231  |
| C | 7.803185  | 7.411293  | 5.462394  |
| H | 8.871844  | 7.535327  | 5.678477  |
| H | 7.388489  | 8.405052  | 5.259941  |
| H | 7.713713  | 6.806104  | 4.553223  |
| C | 4.903325  | 6.515317  | 9.154740  |
| H | 4.482213  | 5.914469  | 9.968687  |
| H | 4.813347  | 5.931271  | 8.233351  |
| H | 4.285651  | 7.410277  | 9.049240  |
| C | 6.345836  | 6.869090  | 9.485115  |
| H | 6.914929  | 5.932873  | 9.577665  |
| C | 6.453916  | 7.633875  | 10.797437 |
| H | 5.917368  | 8.584977  | 10.740364 |
| H | 7.493258  | 7.844013  | 11.067378 |
| H | 6.007058  | 7.045296  | 11.606848 |
| C | 8.115391  | 12.712420 | 9.703678  |
| H | 9.160787  | 12.485677 | 9.459073  |
| H | 7.612299  | 11.763500 | 9.920107  |
| H | 8.109622  | 13.323629 | 10.613205 |
| C | 7.438674  | 13.464720 | 8.565188  |
| H | 6.381650  | 13.613550 | 8.824256  |
| C | 8.104670  | 14.809770 | 8.325936  |
| H | 8.080348  | 15.404040 | 9.246714  |
| H | 7.612890  | 15.397948 | 7.544229  |
| H | 9.157253  | 14.679815 | 8.048581  |
| C | 5.214581  | 13.881557 | 6.090508  |
| H | 4.829538  | 14.518666 | 5.286335  |
| H | 5.207271  | 14.472932 | 7.011609  |
| H | 4.517588  | 13.049867 | 6.217348  |
| C | 6.606790  | 13.391320 | 5.720899  |
| H | 7.259954  | 14.268820 | 5.609801  |
| C | 6.604744  | 12.619439 | 4.408291  |
| H | 5.982191  | 11.723580 | 4.482994  |
| H | 7.611503  | 12.311606 | 4.110035  |

|   |          |           |          |
|---|----------|-----------|----------|
| H | 6.193190 | 13.247656 | 3.610026 |
| C | 4.930822 | 9.918014  | 6.977058 |
| C | 4.975988 | 10.490018 | 8.272122 |
| F | 4.514886 | 10.663724 | 5.939549 |
| F | 4.602346 | 11.773048 | 8.442755 |
| F | 4.520292 | 9.785601  | 9.321702 |
| F | 4.432414 | 8.676484  | 6.818442 |

**(PNP)Rh=CH<sub>2</sub>**

73

Rh (PNP) (CH<sub>2</sub>)

|    |           |           |          |
|----|-----------|-----------|----------|
| Rh | 6.811662  | 10.087833 | 7.760333 |
| P  | 7.202815  | 7.900116  | 7.035527 |
| P  | 7.406014  | 12.303656 | 8.218492 |
| N  | 9.024316  | 9.976300  | 7.717989 |
| C  | 4.963417  | 10.153882 | 7.813060 |
| C  | 9.626839  | 8.755305  | 7.914361 |
| C  | 8.888098  | 7.584690  | 7.629947 |
| C  | 9.426150  | 6.317790  | 7.841773 |
| H  | 8.829692  | 5.433968  | 7.615868 |
| C  | 10.701586 | 6.142715  | 8.358726 |
| C  | 11.421924 | 7.299384  | 8.669325 |
| H  | 12.411580 | 7.198450  | 9.112983 |
| C  | 10.914616 | 8.564670  | 8.456120 |
| H  | 11.500359 | 9.430093  | 8.749119 |
| C  | 9.733950  | 11.112302 | 7.423979 |
| C  | 11.025326 | 11.136445 | 6.851144 |
| H  | 11.518878 | 10.199218 | 6.615676 |
| C  | 11.652145 | 12.324330 | 6.539774 |
| H  | 12.638861 | 12.291237 | 6.079428 |
| C  | 11.057327 | 13.568238 | 6.770729 |
| C  | 9.778634  | 13.558094 | 7.306592 |
| H  | 9.273275  | 14.511120 | 7.461235 |
| C  | 9.117471  | 12.371542 | 7.619297 |
| C  | 11.281503 | 4.783379  | 8.601646 |
| H  | 11.573935 | 4.650790  | 9.649963 |
| H  | 12.179498 | 4.611939  | 7.996215 |
| H  | 10.563912 | 3.994613  | 8.356675 |
| C  | 11.766778 | 14.840891 | 6.424273 |
| H  | 12.675453 | 14.974904 | 7.023416 |
| H  | 11.128263 | 15.712547 | 6.596763 |
| H  | 12.074012 | 14.858588 | 5.371913 |
| C  | 7.687591  | 6.331883  | 4.723061 |
| H  | 7.679381  | 6.283380  | 3.627838 |
| H  | 7.042198  | 5.527746  | 5.092556 |
| H  | 8.712992  | 6.126203  | 5.051960 |
| C  | 7.243428  | 7.709475  | 5.186301 |
| H  | 6.204118  | 7.893285  | 4.875942 |
| C  | 8.124940  | 8.802124  | 4.595035 |
| H  | 9.168446  | 8.673628  | 4.908259 |
| H  | 7.804400  | 9.799503  | 4.916898 |

|   |          |           |           |
|---|----------|-----------|-----------|
| H | 8.096276 | 8.756780  | 3.500349  |
| C | 4.762842 | 6.572373  | 7.055857  |
| H | 4.117380 | 5.810993  | 7.508020  |
| H | 4.773604 | 6.399545  | 5.975152  |
| H | 4.295881 | 7.549703  | 7.237268  |
| C | 6.151415 | 6.515307  | 7.672879  |
| H | 6.636244 | 5.573718  | 7.377648  |
| C | 6.085541 | 6.591330  | 9.190878  |
| H | 5.613998 | 7.529541  | 9.506428  |
| H | 7.078568 | 6.550161  | 9.648352  |
| H | 5.490125 | 5.760496  | 9.586247  |
| C | 8.221371 | 11.797380 | 10.794518 |
| H | 9.275430 | 11.808919 | 10.491195 |
| H | 7.842137 | 10.782602 | 10.635663 |
| H | 8.178070 | 12.026902 | 11.865295 |
| C | 7.424546 | 12.824985 | 10.002575 |
| H | 6.369413 | 12.763149 | 10.307957 |
| C | 7.949521 | 14.231228 | 10.240132 |
| H | 7.905188 | 14.471825 | 11.308876 |
| H | 7.377416 | 14.997930 | 9.706696  |
| H | 8.998472 | 14.309418 | 9.931724  |
| C | 5.094316 | 13.813166 | 7.865757  |
| H | 4.535102 | 14.537871 | 7.263242  |
| H | 5.100561 | 14.175305 | 8.898717  |
| H | 4.538244 | 12.866964 | 7.842969  |
| C | 6.493748 | 13.630343 | 7.300523  |
| H | 7.058320 | 14.564500 | 7.432216  |
| C | 6.454100 | 13.275782 | 5.821142  |
| H | 5.918857 | 12.330459 | 5.668982  |
| H | 7.458440 | 13.158451 | 5.401712  |
| H | 5.935512 | 14.059445 | 5.256890  |
| H | 4.284947 | 9.297520  | 7.656865  |
| H | 4.389004 | 11.073275 | 8.020351  |

**(PNP)Rh=CF<sub>2</sub>**

73

Rh (PNP) (CF<sub>2</sub>)

|    |           |           |           |
|----|-----------|-----------|-----------|
| Rh | 4.134653  | 15.994255 | 1.637800  |
| P  | 2.603092  | 15.156823 | 0.083458  |
| P  | 5.434650  | 16.316862 | 3.553488  |
| N  | 3.391705  | 14.371660 | 2.786454  |
| C  | 4.789961  | 17.423492 | 0.625333  |
| C  | 2.186147  | 13.788619 | 2.426935  |
| C  | 1.685416  | 13.973798 | 1.118430  |
| C  | 0.476574  | 13.401708 | 0.723046  |
| H  | 0.114431  | 13.564076 | -0.291210 |
| C  | -0.310153 | 12.659395 | 1.589631  |
| C  | 0.143453  | 12.548996 | 2.905422  |
| H  | -0.477346 | 12.033164 | 3.636411  |
| C  | 1.341984  | 13.092262 | 3.317814  |

|   |           |           |           |
|---|-----------|-----------|-----------|
| H | 1.619182  | 13.013915 | 4.362581  |
| C | 4.127519  | 13.923732 | 3.872814  |
| C | 4.055706  | 12.615895 | 4.397794  |
| H | 3.408503  | 11.886880 | 3.924255  |
| C | 4.827698  | 12.221945 | 5.470422  |
| H | 4.744437  | 11.196398 | 5.827169  |
| C | 5.728137  | 13.085938 | 6.096669  |
| C | 5.858802  | 14.350817 | 5.545142  |
| H | 6.604228  | 15.023168 | 5.967812  |
| C | 5.101245  | 14.769056 | 4.451366  |
| C | -1.599068 | 12.032125 | 1.157751  |
| H | -2.416629 | 12.279047 | 1.844204  |
| H | -1.526499 | 10.938391 | 1.128703  |
| H | -1.890826 | 12.367139 | 0.158027  |
| C | 6.530850  | 12.644947 | 7.281118  |
| H | 5.903214  | 12.523339 | 8.172137  |
| H | 7.311591  | 13.370699 | 7.527603  |
| H | 7.017508  | 11.679917 | 7.100228  |
| C | 2.405022  | 13.475823 | -2.214370 |
| H | 2.946425  | 12.992043 | -3.035793 |
| H | 1.651569  | 14.133526 | -2.660627 |
| H | 1.887276  | 12.686920 | -1.656931 |
| C | 3.382371  | 14.216397 | -1.316968 |
| H | 3.901206  | 14.993861 | -1.896631 |
| C | 4.424095  | 13.269930 | -0.734977 |
| H | 3.948095  | 12.512064 | -0.100868 |
| H | 5.155935  | 13.805058 | -0.119579 |
| H | 4.955902  | 12.749144 | -1.539272 |
| C | 1.817988  | 17.170413 | -1.711228 |
| H | 0.993661  | 17.734533 | -2.162082 |
| H | 2.351554  | 16.660483 | -2.519592 |
| H | 2.504050  | 17.895214 | -1.261989 |
| C | 1.272147  | 16.214924 | -0.661940 |
| H | 0.555087  | 15.532958 | -1.140447 |
| C | 0.564978  | 16.976504 | 0.450449  |
| H | 1.271792  | 17.634184 | 0.972188  |
| H | 0.119975  | 16.306480 | 1.192523  |
| H | -0.232300 | 17.601706 | 0.032248  |
| C | 3.367049  | 17.654890 | 4.769587  |
| H | 3.079170  | 16.747041 | 5.313625  |
| H | 2.865536  | 17.630903 | 3.795659  |
| H | 2.995266  | 18.517224 | 5.334471  |
| C | 4.880454  | 17.734840 | 4.618689  |
| H | 5.125791  | 18.623429 | 4.018804  |
| C | 5.565518  | 17.826167 | 5.971993  |
| H | 5.213506  | 18.714889 | 6.508744  |
| H | 6.655532  | 17.899633 | 5.895395  |
| H | 5.321422  | 16.954824 | 6.590297  |
| C | 7.788009  | 17.717064 | 2.924528  |
| H | 8.883293  | 17.740203 | 2.953003  |
| H | 7.423559  | 18.585165 | 3.482985  |
| H | 7.484748  | 17.839276 | 1.880067  |

|   |          |           |           |
|---|----------|-----------|-----------|
| C | 7.288359 | 16.395163 | 3.485606  |
| H | 7.648539 | 16.288201 | 4.518596  |
| C | 7.802364 | 15.225025 | 2.658311  |
| H | 7.421537 | 15.287172 | 1.630922  |
| H | 7.495271 | 14.259403 | 3.072042  |
| H | 8.897413 | 15.245749 | 2.614237  |
| F | 4.870204 | 17.522062 | -0.695398 |
| F | 5.284185 | 18.575924 | 1.059027  |

**[(PNP)Rh≡CH]<sup>+</sup>**

72

Rh (PNP) (CH) CATION

|    |           |           |          |
|----|-----------|-----------|----------|
| Rh | 6.885615  | 10.111489 | 7.582160 |
| P  | 7.192419  | 7.819708  | 7.023196 |
| P  | 7.398066  | 12.354679 | 8.184032 |
| N  | 8.958106  | 10.013741 | 7.606195 |
| C  | 5.159688  | 10.196379 | 7.553947 |
| C  | 9.604088  | 8.785004  | 7.819204 |
| C  | 8.915979  | 7.597417  | 7.520420 |
| C  | 9.500953  | 6.351331  | 7.725093 |
| H  | 8.943765  | 5.445419  | 7.492428 |
| C  | 10.778227 | 6.229921  | 8.259084 |
| C  | 11.431097 | 7.410184  | 8.614655 |
| H  | 12.409069 | 7.349024  | 9.086599 |
| C  | 10.869622 | 8.656150  | 8.405850 |
| H  | 11.407127 | 9.540240  | 8.730314 |
| C  | 9.720755  | 11.178062 | 7.416207 |
| C  | 11.003889 | 11.191309 | 6.853907 |
| H  | 11.462005 | 10.262705 | 6.531971 |
| C  | 11.682728 | 12.380404 | 6.665926 |
| H  | 12.671015 | 12.353599 | 6.212468 |
| C  | 11.136271 | 13.614522 | 7.020097 |
| C  | 9.844666  | 13.609797 | 7.531572 |
| H  | 9.371287  | 14.562011 | 7.764886 |
| C  | 9.142113  | 12.422000 | 7.714695 |
| C  | 11.424372 | 4.896514  | 8.461892 |
| H  | 11.965624 | 4.855895  | 9.411863 |
| H  | 12.151920 | 4.686689  | 7.669335 |
| H  | 10.690416 | 4.086482  | 8.454972 |
| C  | 11.907965 | 14.881529 | 6.830709 |
| H  | 12.723814 | 14.958995 | 7.558106 |
| H  | 11.273669 | 15.763336 | 6.952594 |
| H  | 12.361522 | 14.926259 | 5.835700 |
| C  | 7.397496  | 6.050300  | 4.849743 |
| H  | 7.241124  | 5.893410  | 3.777471 |
| H  | 6.802444  | 5.300060  | 5.379799 |
| H  | 8.457452  | 5.862066  | 5.053931 |
| C  | 7.021645  | 7.478349  | 5.214435 |
| H  | 5.955506  | 7.650899  | 5.007332 |
| C  | 7.847275  | 8.491457  | 4.432194 |
| H  | 8.914325  | 8.390557  | 4.663662 |

|   |          |           |           |
|---|----------|-----------|-----------|
| H | 7.549776 | 9.522796  | 4.649356  |
| H | 7.723698 | 8.318378  | 3.358521  |
| C | 4.748164 | 6.594483  | 7.512459  |
| H | 4.169428 | 5.879017  | 8.105083  |
| H | 4.627385 | 6.324339  | 6.459252  |
| H | 4.294311 | 7.581855  | 7.669079  |
| C | 6.198194 | 6.586075  | 7.966289  |
| H | 6.641879 | 5.606106  | 7.737827  |
| C | 6.326357 | 6.858437  | 9.458398  |
| H | 5.893112 | 7.833617  | 9.712204  |
| H | 7.367533 | 6.850851  | 9.794781  |
| H | 5.783277 | 6.094502  | 10.023707 |
| C | 7.949239 | 11.554502 | 10.764543 |
| H | 9.023974 | 11.555320 | 10.546762 |
| H | 7.555128 | 10.562416 | 10.518813 |
| H | 7.829605 | 11.713355 | 11.840908 |
| C | 7.236659 | 12.662851 | 9.999952  |
| H | 6.156140 | 12.589866 | 10.190805 |
| C | 7.744840 | 14.037808 | 10.406110 |
| H | 7.592394 | 14.181891 | 11.480780 |
| H | 7.231151 | 14.855505 | 9.890872  |
| H | 8.820234 | 14.127563 | 10.215875 |
| C | 5.088668 | 13.820785 | 7.705962  |
| H | 4.587238 | 14.602223 | 7.126389  |
| H | 4.981698 | 14.075142 | 8.764486  |
| H | 4.545088 | 12.885215 | 7.520134  |
| C | 6.538231 | 13.702623 | 7.265946  |
| H | 7.070587 | 14.628973 | 7.526377  |
| C | 6.657438 | 13.460523 | 5.768019  |
| H | 6.135974 | 12.539034 | 5.482130  |
| H | 7.698284 | 13.377233 | 5.441350  |
| H | 6.196691 | 14.288503 | 5.220075  |
| H | 4.061410 | 10.251976 | 7.532489  |

**[(PNP)Rh≡CF]<sup>+</sup>**

72

Rh (PNP) (CF) CATION

|    |           |           |          |
|----|-----------|-----------|----------|
| Rh | 6.881593  | 10.119588 | 7.514502 |
| P  | 7.205545  | 7.817103  | 6.993520 |
| P  | 7.402042  | 12.348552 | 8.181176 |
| N  | 8.939323  | 10.027821 | 7.587007 |
| C  | 5.154490  | 10.219387 | 7.327304 |
| C  | 9.578338  | 8.806487  | 7.847833 |
| C  | 8.908778  | 7.610071  | 7.554878 |
| C  | 9.495336  | 6.370555  | 7.802847 |
| H  | 8.950932  | 5.456330  | 7.572876 |
| C  | 10.755616 | 6.270333  | 8.374673 |
| C  | 11.393311 | 7.464143  | 8.717756 |
| H  | 12.360959 | 7.418815  | 9.212602 |
| C  | 10.830577 | 8.701190  | 8.468507 |
| H  | 11.356012 | 9.597983  | 8.778713 |

|   |           |           |           |
|---|-----------|-----------|-----------|
| C | 9.700267  | 11.187534 | 7.369561  |
| C | 10.982437 | 11.187468 | 6.806761  |
| H | 11.440191 | 10.251607 | 6.504825  |
| C | 11.660948 | 12.373722 | 6.599640  |
| H | 12.648919 | 12.339441 | 6.145664  |
| C | 11.115590 | 13.614686 | 6.933306  |
| C | 9.828662  | 13.619990 | 7.454344  |
| H | 9.359412  | 14.575571 | 7.682322  |
| C | 9.127688  | 12.434028 | 7.658007  |
| C | 11.399400 | 4.947886  | 8.647384  |
| H | 11.692540 | 4.856503  | 9.698355  |
| H | 12.308214 | 4.818829  | 8.049773  |
| H | 10.728361 | 4.117818  | 8.412878  |
| C | 11.884522 | 14.877821 | 6.707103  |
| H | 12.765336 | 14.926983 | 7.356561  |
| H | 11.275246 | 15.762458 | 6.908657  |
| H | 12.244338 | 14.945242 | 5.675246  |
| C | 7.461826  | 5.984008  | 4.878999  |
| H | 7.345229  | 5.800791  | 3.805868  |
| H | 6.836823  | 5.255836  | 5.404844  |
| H | 8.510465  | 5.788246  | 5.128974  |
| C | 7.092380  | 7.426270  | 5.190974  |
| H | 6.037278  | 7.606120  | 4.937976  |
| C | 7.962779  | 8.405828  | 4.414979  |
| H | 9.018902  | 8.288388  | 4.684805  |
| H | 7.681171  | 9.447325  | 4.600606  |
| H | 7.871154  | 8.212136  | 3.341691  |
| C | 4.749333  | 6.583675  | 7.445846  |
| H | 4.171516  | 5.854878  | 8.022918  |
| H | 4.663930  | 6.308748  | 6.390223  |
| H | 4.265324  | 7.557639  | 7.589431  |
| C | 6.185444  | 6.609021  | 7.941708  |
| H | 6.645809  | 5.626703  | 7.760902  |
| C | 6.265019  | 6.933018  | 9.427181  |
| H | 5.820276  | 7.914412  | 9.633508  |
| H | 7.295230  | 6.942017  | 9.796270  |
| H | 5.706875  | 6.187157  | 10.001759 |
| C | 8.056196  | 11.407220 | 10.692563 |
| H | 9.121448  | 11.418831 | 10.432569 |
| H | 7.652288  | 10.428186 | 10.410521 |
| H | 7.979357  | 11.508862 | 11.779780 |
| C | 7.316724  | 12.556129 | 10.017099 |
| H | 6.245257  | 12.478337 | 10.251890 |
| C | 7.853903  | 13.905653 | 10.470635 |
| H | 7.757064  | 13.992491 | 11.557965 |
| H | 7.321082  | 14.752670 | 10.026699 |
| H | 8.918866  | 14.000849 | 10.230054 |
| C | 5.095400  | 13.879578 | 7.919518  |
| H | 4.575545  | 14.692037 | 7.402505  |
| H | 5.060546  | 14.095577 | 8.990977  |
| H | 4.518453  | 12.964810 | 7.737382  |
| C | 6.512518  | 13.753043 | 7.384847  |

|   |          |           |          |
|---|----------|-----------|----------|
| H | 7.080519 | 14.653965 | 7.659120 |
| C | 6.536749 | 13.592286 | 5.871978 |
| H | 5.962719 | 12.710153 | 5.564234 |
| H | 7.552797 | 13.488115 | 5.480077 |
| H | 6.079710 | 14.466595 | 5.397952 |
| F | 3.930797 | 10.305611 | 7.103783 |

**(PNP)Rh(CO)**

72

Rh (PNP) (CO)

|    |           |           |          |
|----|-----------|-----------|----------|
| Rh | 6.862922  | 10.109381 | 7.595235 |
| P  | 7.160986  | 7.866182  | 7.016251 |
| P  | 7.365464  | 12.316322 | 8.173344 |
| N  | 8.977439  | 10.008944 | 7.606261 |
| C  | 5.010252  | 10.196483 | 7.586282 |
| C  | 9.584032  | 8.792903  | 7.859644 |
| C  | 8.859802  | 7.605177  | 7.616624 |
| C  | 9.414645  | 6.356923  | 7.886283 |
| H  | 8.831488  | 5.456646  | 7.695183 |
| C  | 10.686852 | 6.219229  | 8.423603 |
| C  | 11.385800 | 7.395905  | 8.699979 |
| H  | 12.369565 | 7.327239  | 9.161931 |
| C  | 10.863087 | 8.644714  | 8.430048 |
| H  | 11.432598 | 9.528948  | 8.697315 |
| C  | 9.698796  | 11.161541 | 7.357649 |
| C  | 10.991467 | 11.186761 | 6.799419 |
| H  | 11.476881 | 10.252044 | 6.538006 |
| C  | 11.633203 | 12.379782 | 6.533983 |
| H  | 12.623282 | 12.353464 | 6.081129 |
| C  | 11.046949 | 13.618078 | 6.803360 |
| C  | 9.761899  | 13.602691 | 7.327710 |
| H  | 9.264577  | 14.554533 | 7.511837 |
| C  | 9.088152  | 12.413164 | 7.592225 |
| C  | 11.283610 | 4.877946  | 8.719655 |
| H  | 11.622304 | 4.808108  | 9.759733 |
| H  | 12.155090 | 4.674022  | 8.086128 |
| H  | 10.560467 | 4.074498  | 8.551626 |
| C  | 11.772695 | 14.895892 | 6.514385 |
| H  | 12.644187 | 15.022678 | 7.167783 |
| H  | 11.124316 | 15.764906 | 6.660062 |
| H  | 12.141147 | 14.925218 | 5.482599 |
| C  | 7.636031  | 6.118415  | 4.829354 |
| H  | 7.608450  | 5.982964  | 3.741797 |
| H  | 7.002964  | 5.342913  | 5.273407 |
| H  | 8.668694  | 5.945306  | 5.154105 |
| C  | 7.190585  | 7.526137  | 5.188786 |
| H  | 6.148956  | 7.681451  | 4.871214 |
| C  | 8.065194  | 8.572244  | 4.509326 |
| H  | 9.109041  | 8.477845  | 4.833776 |
| H  | 7.736982  | 9.590572  | 4.744347 |
| H  | 8.039455  | 8.436866  | 3.422104 |



|   |          |           |           |
|---|----------|-----------|-----------|
| C | 4.742976 | 6.501851  | 7.164326  |
| H | 4.125359 | 5.751552  | 7.670496  |
| H | 4.755608 | 6.253951  | 6.098433  |
| H | 4.241402 | 7.469564  | 7.281254  |
| C | 6.135163 | 6.527809  | 7.778405  |
| H | 6.635517 | 5.570562  | 7.573832  |
| C | 6.069527 | 6.745981  | 9.283293  |
| H | 5.569573 | 7.695073  | 9.510541  |
| H | 7.064182 | 6.774423  | 9.739368  |
| H | 5.497939 | 5.940440  | 9.758112  |
| C | 8.167837 | 11.539931 | 10.693473 |
| H | 9.219764 | 11.533206 | 10.381723 |
| H | 7.746992 | 10.556490 | 10.457755 |
| H | 8.141946 | 11.681965 | 11.779845 |
| C | 7.405115 | 12.661382 | 9.999656  |
| H | 6.349644 | 12.607325 | 10.304672 |
| C | 7.978191 | 14.021886 | 10.360096 |
| H | 7.950418 | 14.163979 | 11.446804 |
| H | 7.427295 | 14.852212 | 9.905795  |
| H | 9.026548 | 14.094515 | 10.047876 |
| C | 5.087050 | 13.898575 | 7.985682  |
| H | 4.549447 | 14.701437 | 7.468950  |
| H | 5.106424 | 14.147353 | 9.051258  |
| H | 4.499642 | 12.981237 | 7.862544  |
| C | 6.479951 | 13.741635 | 7.393101  |
| H | 7.064000 | 14.648893 | 7.603576  |
| C | 6.417146 | 13.525768 | 5.887774  |
| H | 5.835248 | 12.626107 | 5.654514  |
| H | 7.411729 | 13.404382 | 5.447031  |
| H | 5.929494 | 14.379121 | 5.402932  |
| O | 3.859207 | 10.250087 | 7.580856  |

**[(PNP)Rh(NO)]<sup>+</sup>**

72

Rh (PNP) (NO) CATION

|    |           |           |          |
|----|-----------|-----------|----------|
| Rh | 6.870663  | 10.108861 | 7.596229 |
| P  | 7.185259  | 7.821336  | 6.969913 |
| P  | 7.393720  | 12.358976 | 8.219700 |
| N  | 8.887622  | 10.013091 | 7.606645 |
| N  | 5.095108  | 10.192047 | 7.586578 |
| C  | 9.533749  | 8.793900  | 7.877236 |
| C  | 8.869579  | 7.596290  | 7.581801 |
| C  | 9.455853  | 6.361868  | 7.846073 |
| H  | 8.918918  | 5.443695  | 7.614594 |
| C  | 10.711251 | 6.272269  | 8.433872 |
| C  | 11.346788 | 7.469574  | 8.766730 |
| H  | 12.311432 | 7.430248  | 9.267587 |
| C  | 10.783293 | 8.703585  | 8.500640 |
| H  | 11.303795 | 9.606622  | 8.801646 |
| C  | 9.649109  | 11.164705 | 7.340511 |
| C  | 10.907445 | 11.134301 | 6.729185 |

|   |           |           |           |
|---|-----------|-----------|-----------|
| H | 11.342465 | 10.185145 | 6.434470  |
| C | 11.588589 | 12.308329 | 6.467025  |
| H | 12.557246 | 12.253925 | 5.975306  |
| C | 11.067057 | 13.561578 | 6.792219  |
| C | 9.802686  | 13.593276 | 7.367003  |
| H | 9.352723  | 14.558900 | 7.590970  |
| C | 9.098904  | 12.420903 | 7.627133  |
| C | 11.354414 | 4.954022  | 8.726625  |
| H | 11.670126 | 4.888949  | 9.772798  |
| H | 12.249486 | 4.805559  | 8.112870  |
| H | 10.675098 | 4.121431  | 8.527971  |
| C | 11.837249 | 14.811584 | 6.506350  |
| H | 12.723144 | 14.884901 | 7.146543  |
| H | 11.232463 | 15.706010 | 6.675159  |
| H | 12.189445 | 14.833458 | 5.470190  |
| C | 7.591861  | 6.118884  | 4.777087  |
| H | 7.532903  | 5.988252  | 3.691597  |
| H | 6.963236  | 5.348164  | 5.233683  |
| H | 8.632032  | 5.937364  | 5.070272  |
| C | 7.166738  | 7.533084  | 5.143714  |
| H | 6.119515  | 7.698070  | 4.851218  |
| C | 8.042487  | 8.574068  | 4.458173  |
| H | 9.088861  | 8.473609  | 4.770631  |
| H | 7.721397  | 9.597659  | 4.678384  |
| H | 8.005962  | 8.429934  | 3.373806  |
| C | 4.739319  | 6.510989  | 7.170010  |
| H | 4.124366  | 5.772318  | 7.693584  |
| H | 4.746134  | 6.240017  | 6.110521  |
| H | 4.232558  | 7.477716  | 7.271721  |
| C | 6.131072  | 6.545129  | 7.783236  |
| H | 6.629567  | 5.582507  | 7.598411  |
| C | 6.082948  | 6.800478  | 9.282845  |
| H | 5.564935  | 7.742134  | 9.501173  |
| H | 7.080835  | 6.849773  | 9.729615  |
| H | 5.530076  | 5.996987  | 9.779520  |
| C | 8.148387  | 11.546515 | 10.745370 |
| H | 9.203274  | 11.548920 | 10.445657 |
| H | 7.737491  | 10.555480 | 10.525847 |
| H | 8.112070  | 11.699598 | 11.828521 |
| C | 7.380095  | 12.659262 | 10.043960 |
| H | 6.318743  | 12.592775 | 10.324218 |
| C | 7.928619  | 14.030770 | 10.408900 |
| H | 7.868705  | 14.172876 | 11.492895 |
| H | 7.378869  | 14.853016 | 9.940552  |
| H | 8.984526  | 14.114408 | 10.128018 |
| C | 5.084175  | 13.891529 | 7.981180  |
| H | 4.547549  | 14.681028 | 7.445776  |
| H | 5.102990  | 14.167448 | 9.039243  |
| H | 4.490649  | 12.975671 | 7.877899  |
| C | 6.474272  | 13.723635 | 7.386541  |
| H | 7.058394  | 14.636430 | 7.573299  |
| C | 6.421647  | 13.464868 | 5.887642  |

|   |          |           |          |
|---|----------|-----------|----------|
| H | 5.820537 | 12.574506 | 5.666966 |
| H | 7.416229 | 13.319638 | 5.454516 |
| H | 5.952959 | 14.313550 | 5.379666 |
| O | 3.955632 | 10.244573 | 7.579137 |

**(PNP)Rh=C(F)(CF<sub>3</sub>)**

76

Rh (PNP) (CF<sub>3</sub>)

|    |           |           |          |
|----|-----------|-----------|----------|
| Rh | 6.841979  | 10.242011 | 7.611036 |
| P  | 7.180984  | 8.043141  | 6.874918 |
| P  | 7.442921  | 12.480730 | 7.977646 |
| N  | 9.021902  | 10.086992 | 7.600322 |
| C  | 5.006317  | 10.361844 | 7.725465 |
| C  | 9.599004  | 8.848808  | 7.801475 |
| C  | 8.849501  | 7.694006  | 7.492353 |
| C  | 9.362670  | 6.416690  | 7.703787 |
| H  | 8.757513  | 5.544687  | 7.457594 |
| C  | 10.623489 | 6.218361  | 8.246514 |
| C  | 11.352839 | 7.360952  | 8.585171 |
| H  | 12.329719 | 7.241183  | 9.051273 |
| C  | 10.868969 | 8.635733  | 8.372763 |
| H  | 11.460203 | 9.489062  | 8.688420 |
| C  | 9.767348  | 11.204611 | 7.308174 |
| C  | 11.073529 | 11.184102 | 6.770700 |
| H  | 11.546660 | 10.231117 | 6.559209 |
| C  | 11.744545 | 12.348892 | 6.465174 |
| H  | 12.742356 | 12.280260 | 6.033889 |
| C  | 11.181624 | 13.612662 | 6.665146 |
| C  | 9.886447  | 13.646020 | 7.157346 |
| H  | 9.402501  | 14.614358 | 7.280460 |
| C  | 9.181320  | 12.482347 | 7.462824 |
| C  | 11.178246 | 4.848559  | 8.488066 |
| H  | 11.453111 | 4.704802  | 9.539463 |
| H  | 12.082037 | 4.667741  | 7.894367 |
| H  | 10.451919 | 4.073359  | 8.227049 |
| C  | 11.940857 | 14.858902 | 6.329022 |
| H  | 12.827055 | 14.976806 | 6.963916 |
| H  | 11.321505 | 15.751085 | 6.460480 |
| H  | 12.292187 | 14.848985 | 5.290630 |
| C  | 7.662615  | 6.536940  | 4.531472 |
| H  | 7.673547  | 6.518630  | 3.435582 |
| H  | 6.989377  | 5.741134  | 4.866670 |
| H  | 8.676084  | 6.295158  | 4.872885 |
| C  | 7.247372  | 7.914412  | 5.022634 |
| H  | 6.218447  | 8.135394  | 4.702486 |
| C  | 8.169330  | 8.995204  | 4.473243 |
| H  | 9.202373  | 8.834476  | 4.805567 |
| H  | 7.866183  | 9.994566  | 4.803808 |
| H  | 8.162872  | 8.969491  | 3.377695 |
| C  | 4.725400  | 6.747198  | 6.800210 |
| H  | 4.064214  | 5.979382  | 7.216620 |

|   |          |           |           |
|---|----------|-----------|-----------|
| H | 4.764720 | 6.599567  | 5.716653  |
| H | 4.254624 | 7.718587  | 6.991497  |
| C | 6.096612 | 6.660987  | 7.453418  |
| H | 6.581278 | 5.723596  | 7.144612  |
| C | 5.995002 | 6.691880  | 8.970990  |
| H | 5.520953 | 7.619235  | 9.310696  |
| H | 6.975433 | 6.624364  | 9.451800  |
| H | 5.381479 | 5.855181  | 9.323220  |
| C | 8.096806 | 12.037531 | 10.608015 |
| H | 9.166503 | 12.024557 | 10.366146 |
| H | 7.708985 | 11.024300 | 10.460973 |
| H | 7.994745 | 12.301841 | 11.666387 |
| C | 7.363874 | 13.052243 | 9.741288  |
| H | 6.291839 | 13.015122 | 9.985990  |
| C | 7.896204 | 14.458237 | 9.963910  |
| H | 7.789119 | 14.734027 | 11.019327 |
| H | 7.369929 | 15.214117 | 9.371551  |
| H | 8.963561 | 14.510992 | 9.719968  |
| C | 5.182675 | 14.016629 | 7.413860  |
| H | 4.716748 | 14.790507 | 6.793677  |
| H | 5.120135 | 14.345723 | 8.455897  |
| H | 4.577842 | 13.109532 | 7.307712  |
| C | 6.610299 | 13.775615 | 6.950305  |
| H | 7.190297 | 14.701585 | 7.073789  |
| C | 6.647662 | 13.353003 | 5.488390  |
| H | 6.093155 | 12.416702 | 5.348840  |
| H | 7.670142 | 13.196278 | 5.130437  |
| H | 6.179743 | 14.121215 | 4.862345  |
| F | 4.117010 | 10.514199 | 6.728642  |
| C | 4.162697 | 10.323902 | 9.001029  |
| F | 3.279791 | 9.317543  | 8.961205  |
| F | 4.911425 | 10.162260 | 10.084462 |
| F | 3.474919 | 11.463929 | 9.148766  |

**[(PNP)Rh≡CCF<sub>3</sub>]<sup>+</sup>**

75

Rh (PNP) (CCF<sub>3</sub>) CATION

|    |           |           |          |
|----|-----------|-----------|----------|
| Rh | 6.835781  | 10.088918 | 7.389219 |
| P  | 7.171578  | 7.820635  | 6.727130 |
| P  | 7.316120  | 12.359958 | 7.920165 |
| N  | 8.887614  | 9.984662  | 7.392457 |
| C  | 5.143597  | 10.201293 | 7.748598 |
| C  | 9.525125  | 8.762876  | 7.672498 |
| C  | 8.857172  | 7.575364  | 7.335854 |
| C  | 9.426361  | 6.332997  | 7.587857 |
| H  | 8.889218  | 5.424027  | 7.323399 |
| C  | 10.664965 | 6.220290  | 8.210783 |
| C  | 11.297407 | 7.403153  | 8.593529 |
| H  | 12.243987 | 7.344581  | 9.125779 |
| C  | 10.751018 | 8.647332  | 8.336931 |
| H  | 11.267372 | 9.536929  | 8.680593 |

|   |           |           |           |
|---|-----------|-----------|-----------|
| C | 9.656862  | 11.151137 | 7.235787  |
| C | 10.959372 | 11.147091 | 6.718832  |
| H | 11.423389 | 10.209588 | 6.432689  |
| C | 11.646563 | 12.329978 | 6.527555  |
| H | 12.649386 | 12.291687 | 6.108219  |
| C | 11.090656 | 13.572437 | 6.836642  |
| C | 9.785868  | 13.581228 | 7.311132  |
| H | 9.309866  | 14.538777 | 7.513374  |
| C | 9.072935  | 12.398758 | 7.496549  |
| C | 11.285848 | 4.890402  | 8.495237  |
| H | 11.534822 | 4.787798  | 9.556437  |
| H | 12.218025 | 4.761532  | 7.934857  |
| H | 10.619199 | 4.068036  | 8.224895  |
| C | 11.866646 | 14.833833 | 6.630342  |
| H | 12.737452 | 14.874730 | 7.293341  |
| H | 11.257538 | 15.719423 | 6.827021  |
| H | 12.242849 | 14.904527 | 5.604652  |
| C | 7.582630  | 6.210528  | 4.472218  |
| H | 7.520097  | 6.119598  | 3.382951  |
| H | 6.961390  | 5.418705  | 4.901940  |
| H | 8.625400  | 6.026524  | 4.754805  |
| C | 7.146872  | 7.606702  | 4.891600  |
| H | 6.095207  | 7.772331  | 4.617130  |
| C | 8.004687  | 8.680574  | 4.235109  |
| H | 9.054609  | 8.586851  | 4.537676  |
| H | 7.668481  | 9.692169  | 4.487139  |
| H | 7.962936  | 8.569114  | 3.147111  |
| C | 4.718513  | 6.536956  | 6.887178  |
| H | 4.077799  | 5.827016  | 7.419376  |
| H | 4.710638  | 6.260295  | 5.829200  |
| H | 4.254200  | 7.525242  | 6.985727  |
| C | 6.114460  | 6.517368  | 7.489557  |
| H | 6.602055  | 5.563909  | 7.238070  |
| C | 6.093664  | 6.679505  | 9.002371  |
| H | 5.604032  | 7.616601  | 9.289130  |
| H | 7.098298  | 6.673027  | 9.435852  |
| H | 5.525590  | 5.860113  | 9.453741  |
| C | 7.734780  | 11.703764 | 10.562739 |
| H | 8.814584  | 11.641847 | 10.380542 |
| H | 7.299974  | 10.717090 | 10.371512 |
| H | 7.591167  | 11.940023 | 11.621639 |
| C | 7.094719  | 12.786040 | 9.704127  |
| H | 6.006727  | 12.762871 | 9.854832  |
| C | 7.632738  | 14.167686 | 10.044989 |
| H | 7.427951  | 14.386701 | 11.097958 |
| H | 7.174652  | 14.965100 | 9.451192  |
| H | 8.719119  | 14.210529 | 9.909778  |
| C | 5.022519  | 13.783768 | 7.256108  |
| H | 4.557599  | 14.549375 | 6.627289  |
| H | 4.878081  | 14.083168 | 8.298570  |
| H | 4.471193  | 12.851842 | 7.080270  |
| C | 6.485158  | 13.628849 | 6.874874  |

|   |          |           |          |
|---|----------|-----------|----------|
| H | 7.014974 | 14.571836 | 7.074013 |
| C | 6.649396 | 13.257748 | 5.407486 |
| H | 6.129166 | 12.316938 | 5.189992 |
| H | 7.699727 | 13.144146 | 5.120935 |
| H | 6.209351 | 14.035203 | 4.775281 |
| C | 3.844229 | 10.323256 | 8.485643 |
| F | 4.007561 | 11.058075 | 9.585530 |
| F | 2.913353 | 10.900266 | 7.736034 |
| F | 3.425674 | 9.111597  | 8.836512 |

**[(PNP)Rh( $\eta^1$ -CFCF<sub>2</sub>)]<sup>+</sup>**

75

| Rh (PNP) (h1-CFCF2) | CATION    |           |          |
|---------------------|-----------|-----------|----------|
| Rh                  | 6.980467  | 10.192671 | 7.687308 |
| P                   | 7.113171  | 7.967718  | 6.979790 |
| P                   | 7.381583  | 12.475476 | 8.165332 |
| N                   | 8.983941  | 10.074534 | 7.668764 |
| C                   | 5.009183  | 10.302030 | 7.349125 |
| C                   | 9.614657  | 8.823174  | 7.742260 |
| C                   | 8.866314  | 7.671812  | 7.425281 |
| C                   | 9.439455  | 6.418077  | 7.560163 |
| H                   | 8.864668  | 5.530807  | 7.305165 |
| C                   | 10.736251 | 6.250545  | 8.046872 |
| C                   | 11.443774 | 7.395282  | 8.419873 |
| H                   | 12.431893 | 7.287681  | 8.859480 |
| C                   | 10.909039 | 8.655918  | 8.265996 |
| H                   | 11.466032 | 9.515976  | 8.618860 |
| C                   | 9.750740  | 11.219420 | 7.448647 |
| C                   | 11.008832 | 11.189464 | 6.817026 |
| H                   | 11.410707 | 10.249385 | 6.457635 |
| C                   | 11.709684 | 12.352694 | 6.591635 |
| H                   | 12.671060 | 12.307748 | 6.086725 |
| C                   | 11.198003 | 13.594195 | 6.976469 |
| C                   | 9.915327  | 13.628081 | 7.529685 |
| H                   | 9.484520  | 14.599028 | 7.760228 |
| C                   | 9.178703  | 12.476453 | 7.748688 |
| C                   | 11.344639 | 4.897378  | 8.199151 |
| H                   | 11.696187 | 4.739152  | 9.224006 |
| H                   | 12.216602 | 4.785164  | 7.545470 |
| H                   | 10.636270 | 4.103160  | 7.954826 |
| C                   | 11.987024 | 14.839944 | 6.757733 |
| H                   | 12.873069 | 14.854894 | 7.402471 |
| H                   | 11.402615 | 15.737416 | 6.970055 |
| H                   | 12.348528 | 14.899587 | 5.726015 |
| C                   | 7.415396  | 6.379213  | 4.659716 |
| H                   | 7.260416  | 6.305393  | 3.578133 |
| H                   | 6.846886  | 5.567969  | 5.124893 |
| H                   | 8.482211  | 6.208185  | 4.845069 |
| C                   | 6.989900  | 7.756892  | 5.140953 |
| H                   | 5.920586  | 7.910532  | 4.942312 |
| C                   | 7.774282  | 8.861149  | 4.445988 |

|   |          |           |           |
|---|----------|-----------|-----------|
| H | 8.848178 | 8.781906  | 4.660290  |
| H | 7.434776 | 9.856631  | 4.753210  |
| H | 7.651458 | 8.777261  | 3.361417  |
| C | 4.723394 | 6.572154  | 7.334442  |
| H | 4.211198 | 5.728386  | 7.807343  |
| H | 4.608449 | 6.464068  | 6.252143  |
| H | 4.203784 | 7.486143  | 7.638593  |
| C | 6.177776 | 6.591020  | 7.783102  |
| H | 6.659841 | 5.654787  | 7.468005  |
| C | 6.283509 | 6.733229  | 9.295341  |
| H | 5.809807 | 7.664975  | 9.626772  |
| H | 7.319610 | 6.735865  | 9.648291  |
| H | 5.763710 | 5.903370  | 9.784626  |
| C | 7.744453 | 11.981751 | 10.845641 |
| H | 8.817807 | 11.812182 | 10.692295 |
| H | 7.223460 | 11.030874 | 10.690308 |
| H | 7.605221 | 12.282258 | 11.888967 |
| C | 7.223287 | 13.067192 | 9.915386  |
| H | 6.137808 | 13.154468 | 10.054249 |
| C | 7.876691 | 14.411337 | 10.190484 |
| H | 7.660664 | 14.717874 | 11.219197 |
| H | 7.512283 | 15.206975 | 9.532917  |
| H | 8.966390 | 14.349581 | 10.095657 |
| C | 5.283518 | 14.149805 | 7.357491  |
| H | 4.959702 | 14.971392 | 6.710311  |
| H | 5.125556 | 14.464697 | 8.393187  |
| H | 4.629135 | 13.296322 | 7.149654  |
| C | 6.733368 | 13.807661 | 7.049212  |
| H | 7.352416 | 14.697330 | 7.230385  |
| C | 6.895007 | 13.370587 | 5.599078  |
| H | 6.282924 | 12.483995 | 5.394824  |
| H | 7.933483 | 13.134588 | 5.341507  |
| H | 6.558994 | 14.169540 | 4.929795  |
| F | 4.437027 | 9.590017  | 6.342394  |
| C | 4.089664 | 10.856319 | 8.165685  |
| F | 4.391873 | 11.599993 | 9.203126  |
| F | 2.802312 | 10.671111 | 8.084517  |

**[(PNP)Rh( $\eta^2$ -CFCF<sub>2</sub>)]<sup>+</sup>**

75

Rh (PNP) ( $\eta^2$ -CFCF<sub>2</sub>)

|    |           |           |          |
|----|-----------|-----------|----------|
| Rh | 6.856493  | 10.113526 | 7.659430 |
| P  | 7.215289  | 7.835527  | 6.993516 |
| P  | 7.427123  | 12.389906 | 8.152059 |
| N  | 8.946278  | 10.005800 | 7.687894 |
| C  | 9.592809  | 8.770045  | 7.872054 |
| C  | 8.914481  | 7.592502  | 7.540571 |
| C  | 9.495431  | 6.340031  | 7.722415 |
| H  | 8.942031  | 5.439378  | 7.460281 |
| C  | 10.764916 | 6.210446  | 8.261245 |

|   |           |           |           |
|---|-----------|-----------|-----------|
| C | 11.420077 | 7.385270  | 8.636896  |
| H | 12.397731 | 7.312242  | 9.109208  |
| C | 10.859374 | 8.633452  | 8.450300  |
| H | 11.397667 | 9.514757  | 8.784526  |
| C | 9.708241  | 11.142991 | 7.398673  |
| C | 10.975622 | 11.111334 | 6.795107  |
| H | 11.420842 | 10.160997 | 6.524226  |
| C | 11.656367 | 12.280497 | 6.511919  |
| H | 12.631240 | 12.215989 | 6.033497  |
| C | 11.129796 | 13.541825 | 6.798715  |
| C | 9.857579  | 13.580633 | 7.351751  |
| H | 9.401563  | 14.550020 | 7.539026  |
| C | 9.154541  | 12.411042 | 7.635118  |
| C | 11.403941 | 4.873027  | 8.468049  |
| H | 11.700206 | 4.727499  | 9.509633  |
| H | 12.312054 | 4.765027  | 7.856456  |
| H | 10.723970 | 4.055638  | 8.192697  |
| C | 11.891842 | 14.785418 | 6.482495  |
| H | 12.815875 | 14.849593 | 7.072793  |
| H | 11.307225 | 15.685247 | 6.690029  |
| H | 12.189183 | 14.814975 | 5.426596  |
| C | 7.610245  | 6.399234  | 4.622024  |
| H | 7.540085  | 6.387179  | 3.529685  |
| H | 7.003823  | 5.567440  | 4.996468  |
| H | 8.657278  | 6.217048  | 4.885672  |
| C | 7.150620  | 7.753867  | 5.142038  |
| H | 6.092067  | 7.911384  | 4.892705  |
| C | 7.975791  | 8.886284  | 4.542629  |
| H | 9.027841  | 8.807937  | 4.837281  |
| H | 7.613727  | 9.878968  | 4.849219  |
| H | 7.929725  | 8.832160  | 3.445881  |
| C | 4.780734  | 6.489314  | 7.150561  |
| H | 4.216583  | 5.650581  | 7.568320  |
| H | 4.708907  | 6.422354  | 6.059843  |
| H | 4.272075  | 7.404066  | 7.478347  |
| C | 6.216488  | 6.435378  | 7.654922  |
| H | 6.698428  | 5.539202  | 7.233613  |
| C | 6.297511  | 6.366615  | 9.173288  |
| H | 5.847713  | 7.248576  | 9.637673  |
| H | 7.330566  | 6.284403  | 9.529685  |
| H | 5.750107  | 5.489083  | 9.528378  |
| C | 7.962991  | 11.763748 | 10.780120 |
| H | 9.026077  | 11.662992 | 10.532272 |
| H | 7.487318  | 10.787474 | 10.632879 |
| H | 7.890070  | 12.024584 | 11.839065 |
| C | 7.307309  | 12.849720 | 9.937174  |
| H | 6.229455  | 12.871042 | 10.153000 |
| C | 7.912686  | 14.219333 | 10.214247 |
| H | 7.793918  | 14.457853 | 11.275543 |
| H | 7.435198  | 15.021249 | 9.643227  |
| H | 8.988504  | 14.223771 | 9.996417  |
| C | 5.137752  | 13.913517 | 7.549926  |



|   |          |           |          |
|---|----------|-----------|----------|
| H | 4.721797 | 14.733987 | 6.955274 |
| H | 5.037210 | 14.179683 | 8.601657 |
| H | 4.517380 | 13.032492 | 7.356908 |
| C | 6.580443 | 13.674220 | 7.127914 |
| H | 7.159139 | 14.589336 | 7.310159 |
| C | 6.683871 | 13.309006 | 5.652144 |
| H | 6.107372 | 12.402547 | 5.436624 |
| H | 7.716199 | 13.142894 | 5.331153 |
| H | 6.268408 | 14.116514 | 5.044756 |
| C | 5.085487 | 10.179296 | 7.147161 |
| C | 4.956939 | 10.176344 | 8.542601 |
| F | 4.298170 | 10.091858 | 6.131173 |
| F | 4.626649 | 11.261771 | 9.239936 |
| F | 4.524872 | 9.103650  | 9.202402 |

34

**Rh\_PINCER\_STRIPPED\_C2F4\_PERP**

|    |           |           |           |
|----|-----------|-----------|-----------|
| Rh | 6.902212  | 10.110491 | 7.567406  |
| P  | 7.177114  | 7.836202  | 6.955697  |
| P  | 7.376712  | 12.347672 | 8.193817  |
| N  | 9.004232  | 10.010076 | 7.594403  |
| C  | 9.631440  | 8.838103  | 7.289584  |
| C  | 8.964339  | 7.709429  | 6.964548  |
| C  | 9.732291  | 11.117574 | 7.915697  |
| C  | 9.167676  | 12.304764 | 8.226101  |
| C  | 6.629298  | 7.249128  | 5.312753  |
| H  | 5.538692  | 7.178988  | 5.291131  |
| C  | 6.564081  | 6.509894  | 8.055532  |
| H  | 7.002609  | 5.548702  | 7.766267  |
| C  | 6.849837  | 12.975532 | 9.828642  |
| H  | 5.770693  | 13.149372 | 9.826741  |
| C  | 6.916765  | 13.731623 | 7.090476  |
| H  | 7.436195  | 14.645870 | 7.397474  |
| C  | 5.001965  | 10.388574 | 6.856260  |
| C  | 4.963043  | 10.017899 | 8.220072  |
| F  | 4.651650  | 11.632803 | 6.495619  |
| F  | 4.574972  | 10.913903 | 9.140894  |
| F  | 4.482659  | 8.813785  | 8.567316  |
| F  | 4.558301  | 9.532865  | 5.922482  |
| H  | 6.840467  | 6.738990  | 9.087171  |
| H  | 5.474642  | 6.450131  | 7.989699  |
| H  | 6.949551  | 7.961001  | 4.548700  |
| H  | 7.064501  | 6.266624  | 5.100194  |
| H  | 9.483400  | 6.786338  | 6.724655  |
| H  | 10.725875 | 8.844822  | 7.318707  |
| H  | 10.821535 | 11.007021 | 7.912828  |
| H  | 9.766129  | 13.174701 | 8.479362  |
| H  | 7.194764  | 13.483613 | 6.063679  |
| H  | 5.836427  | 13.892802 | 7.131766  |
| H  | 7.083376  | 12.232082 | 10.594070 |
| H  | 7.371858  | 13.910713 | 10.058456 |

34

**Rh\_PINCER\_STRIPPED\_C2F4\_45\_DEG**

|    |          |           |          |
|----|----------|-----------|----------|
| Rh | 6.931047 | 10.134277 | 7.753177 |
| P  | 7.238621 | 7.846088  | 7.255127 |
| P  | 7.462668 | 12.413414 | 8.097932 |
| N  | 9.054069 | 10.054287 | 7.628146 |
| C  | 9.680195 | 8.879701  | 7.348034 |
| C  | 9.014932 | 7.720570  | 7.151577 |
| C  | 9.794569 | 11.182406 | 7.799390 |
| C  | 9.245219 | 12.395103 | 8.027650 |
| C  | 6.568797 | 7.284340  | 5.650094 |
| H  | 5.476837 | 7.287078  | 5.681041 |
| C  | 6.688449 | 6.542832  | 8.411876 |
| H  | 7.090865 | 5.572881  | 8.099731 |

|   |           |           |           |
|---|-----------|-----------|-----------|
| C | 7.011299  | 13.165600 | 9.700902  |
| H | 5.927128  | 13.274953 | 9.773130  |
| C | 6.897328  | 13.657873 | 6.884582  |
| H | 7.391262  | 14.617267 | 7.073342  |
| C | 4.990228  | 10.829419 | 7.512940  |
| C | 4.975122  | 9.594388  | 8.191257  |
| F | 4.544585  | 11.926781 | 8.160777  |
| F | 4.673455  | 9.566332  | 9.495031  |
| F | 4.381612  | 8.538703  | 7.593158  |
| F | 4.566541  | 10.885856 | 6.243689  |
| H | 7.055700  | 6.777772  | 9.413483  |
| H | 5.597267  | 6.493428  | 8.433850  |
| H | 6.905802  | 7.969433  | 4.868942  |
| H | 6.927969  | 6.274083  | 5.425106  |
| H | 9.526331  | 6.787546  | 6.937317  |
| H | 10.772637 | 8.909058  | 7.289224  |
| H | 10.881327 | 11.068760 | 7.737626  |
| H | 9.847288  | 13.288322 | 8.160863  |
| H | 7.151599  | 13.314156 | 5.879209  |
| H | 5.814315  | 13.786595 | 6.954296  |
| H | 7.361022  | 12.516355 | 10.506512 |
| H | 7.486160  | 14.148268 | 9.797807  |

34

**Rh\_PINCER\_STRIPPED\_C2F4\_INPLANE**

|    |          |           |          |
|----|----------|-----------|----------|
| Rh | 6.889890 | 10.113098 | 7.603849 |
| P  | 7.237443 | 7.842178  | 7.017334 |
| P  | 7.427262 | 12.395516 | 7.941253 |
| N  | 9.025949 | 10.030313 | 7.580627 |
| C  | 9.665692 | 8.857732  | 7.334982 |
| C  | 9.013028 | 7.707264  | 7.063109 |
| C  | 9.760345 | 11.146648 | 7.824018 |
| C  | 9.204662 | 12.356767 | 8.048852 |
| C  | 6.714341 | 7.354867  | 5.334756 |
| H  | 5.624638 | 7.299960  | 5.279366 |
| C  | 6.582585 | 6.477399  | 8.038458 |
| H  | 7.061341 | 5.539013  | 7.738032 |
| C  | 6.824230 | 13.322925 | 9.393273 |
| H  | 5.754536 | 13.523693 | 9.294886 |
| C  | 7.017782 | 13.520355 | 6.558761 |
| H  | 7.512512 | 14.485929 | 6.710332 |
| C  | 4.969379 | 10.855987 | 7.897480 |
| C  | 4.905159 | 9.491019  | 7.555382 |
| F  | 4.636409 | 11.216797 | 9.147674 |
| F  | 4.496765 | 8.617397  | 8.491815 |
| F  | 4.367902 | 9.142729  | 6.373474 |
| F  | 4.475294 | 11.765679 | 7.038150 |
| H  | 6.796634 | 6.673905  | 9.091079 |
| H  | 5.500994 | 6.393979  | 7.908452 |
| H  | 7.066941 | 8.105069  | 4.623434 |
| H  | 7.146162 | 6.380908  | 5.080275 |

|   |           |           |           |
|---|-----------|-----------|-----------|
| H | 9.531925  | 6.773322  | 6.872085  |
| H | 10.759125 | 8.880927  | 7.365323  |
| H | 10.847727 | 11.025980 | 7.829253  |
| H | 9.797602  | 13.244637 | 8.243696  |
| H | 7.372911  | 13.075228 | 5.626574  |
| H | 5.937271  | 13.666021 | 6.494386  |
| H | 6.989900  | 12.733957 | 10.297698 |
| H | 7.367874  | 14.270814 | 9.470052  |

34

**Rh\_PINCER\_STRIPPED\_C2H4\_PERP**

|    |           |           |           |
|----|-----------|-----------|-----------|
| Rh | 6.942365  | 10.108465 | 7.568047  |
| P  | 7.193123  | 7.866675  | 6.958703  |
| P  | 7.390160  | 12.316835 | 8.186175  |
| N  | 9.027892  | 10.008962 | 7.594110  |
| C  | 9.651077  | 8.838611  | 7.287169  |
| C  | 8.978471  | 7.709613  | 6.960897  |
| C  | 9.751873  | 11.115619 | 7.915674  |
| C  | 9.181877  | 12.303949 | 8.226398  |
| C  | 6.629818  | 7.279070  | 5.313167  |
| H  | 5.535680  | 7.243485  | 5.283894  |
| C  | 6.560201  | 6.526697  | 8.042292  |
| H  | 6.955410  | 5.553090  | 7.731638  |
| C  | 6.845934  | 12.955569 | 9.819068  |
| H  | 5.759583  | 13.093744 | 9.822734  |
| C  | 6.912782  | 13.710378 | 7.090537  |
| H  | 7.391089  | 14.642201 | 7.412291  |
| C  | 4.911879  | 10.390992 | 6.868986  |
| C  | 4.874888  | 10.025280 | 8.209500  |
| H  | 4.774480  | 11.428223 | 6.570218  |
| H  | 4.707999  | 10.769237 | 8.985785  |
| H  | 4.628479  | 9.006781  | 8.502661  |
| H  | 4.694884  | 9.665773  | 6.087348  |
| H  | 6.865320  | 6.727678  | 9.071994  |
| H  | 5.466430  | 6.495915  | 7.998145  |
| H  | 6.979833  | 7.975568  | 4.547546  |
| H  | 7.023110  | 6.279002  | 5.099198  |
| H  | 9.495708  | 6.786082  | 6.717511  |
| H  | 10.745988 | 8.842226  | 7.314578  |
| H  | 10.841854 | 11.008207 | 7.913933  |
| H  | 9.778483  | 13.174760 | 8.482175  |
| H  | 7.221627  | 13.481119 | 6.067872  |
| H  | 5.826127  | 13.844833 | 7.109142  |
| H  | 7.110844  | 12.229568 | 10.591424 |
| H  | 7.326249  | 13.914363 | 10.044033 |

34

**Rh\_PINCER\_STRIPPED\_45\_DEG**

|    |           |           |           |
|----|-----------|-----------|-----------|
| Rh | 6.953387  | 10.124232 | 7.459174  |
| P  | 7.218505  | 7.878054  | 6.892345  |
| P  | 7.436010  | 12.319322 | 8.079250  |
| N  | 9.040498  | 9.975190  | 7.634070  |
| C  | 9.655178  | 8.780552  | 7.426095  |
| C  | 8.983219  | 7.657399  | 7.078156  |
| C  | 9.775187  | 11.075069 | 7.948184  |
| C  | 9.220316  | 12.286451 | 8.191081  |
| C  | 6.795348  | 7.200677  | 5.240111  |
| H  | 5.710348  | 7.192008  | 5.096546  |
| C  | 6.395718  | 6.664640  | 7.994750  |
| H  | 6.701746  | 5.638889  | 7.760202  |
| C  | 6.845709  | 13.091617 | 9.635630  |
| H  | 5.764597  | 13.257171 | 9.594657  |
| C  | 6.986668  | 13.606638 | 6.851894  |
| H  | 7.387360  | 14.586932 | 7.133496  |
| C  | 4.943408  | 10.021588 | 6.642443  |
| C  | 4.872159  | 10.517219 | 7.938648  |
| H  | 4.893942  | 10.693732 | 5.787028  |
| H  | 4.687817  | 11.575379 | 8.109122  |
| H  | 4.591892  | 9.868171  | 8.766940  |
| H  | 4.642712  | 8.997710  | 6.432765  |
| H  | 6.659547  | 6.894186  | 9.029827  |
| H  | 5.308813  | 6.748260  | 7.883246  |
| H  | 7.247664  | 7.830295  | 4.470508  |
| H  | 7.174355  | 6.177754  | 5.136799  |
| H  | 9.491301  | 6.713121  | 6.907604  |
| H  | 10.743009 | 8.759878  | 7.549798  |
| H  | 10.860583 | 10.941175 | 8.003967  |
| H  | 9.821460  | 13.152324 | 8.451411  |
| H  | 7.386738  | 13.317445 | 5.877214  |
| H  | 5.895428  | 13.673791 | 6.776954  |
| H  | 7.068837  | 12.425290 | 10.471965 |
| H  | 7.345026  | 14.053269 | 9.798683  |

34

**Rh\_PINCER\_STRIPPED\_C2H4\_INPLANE**

|    |          |           |           |
|----|----------|-----------|-----------|
| Rh | 6.916306 | 10.105350 | 7.580047  |
| P  | 7.236235 | 7.855262  | 7.051971  |
| P  | 7.430754 | 12.267750 | 8.296310  |
| N  | 9.032609 | 10.042758 | 7.467971  |
| C  | 9.667094 | 8.891478  | 7.131583  |
| C  | 9.006634 | 7.738961  | 6.871005  |
| C  | 9.767560 | 11.138173 | 7.785704  |
| C  | 9.211168 | 12.301840 | 8.196273  |
| C  | 6.506225 | 7.099575  | 5.550275  |
| H  | 5.420343 | 7.016023  | 5.659790  |
| C  | 6.766770 | 6.622995  | 8.327398  |
| H  | 7.167000 | 5.636284  | 8.068695  |
| C  | 6.991661 | 12.743694 | 10.011824 |
| H  | 5.909208 | 12.879373 | 10.101632 |
| C  | 6.839925 | 13.734195 | 7.367252  |

|   |           |           |           |
|---|-----------|-----------|-----------|
| H | 7.345059  | 14.638994 | 7.723707  |
| C | 4.904474  | 10.820177 | 7.913783  |
| C | 4.843883  | 9.525272  | 7.400177  |
| H | 4.729243  | 10.992485 | 8.974130  |
| H | 4.602371  | 8.693474  | 8.059459  |
| H | 4.598469  | 9.371251  | 6.350859  |
| H | 4.686003  | 11.664381 | 7.262606  |
| H | 7.177000  | 6.937175  | 9.289852  |
| H | 5.677514  | 6.554577  | 8.410698  |
| H | 6.728672  | 7.730420  | 4.686582  |
| H | 6.924135  | 6.100439  | 5.383823  |
| H | 9.521761  | 6.822890  | 6.599055  |
| H | 10.759861 | 8.930114  | 7.081718  |
| H | 10.854488 | 11.041522 | 7.699424  |
| H | 9.807154  | 13.175360 | 8.442124  |
| H | 7.057689  | 13.596440 | 6.305651  |
| H | 5.760112  | 13.857448 | 7.496797  |
| H | 7.308076  | 11.950781 | 10.693398 |
| H | 7.491893  | 13.678581 | 10.288091 |

31

**Rh\_PINCER\_STRIPPED\_CF2\_INPLANE**

|    |          |           |           |
|----|----------|-----------|-----------|
| Rh | 6.923821 | 10.109679 | 7.591744  |
| P  | 7.168805 | 7.847727  | 7.023835  |
| P  | 7.372115 | 12.338494 | 8.166363  |
| N  | 9.017657 | 10.010683 | 7.608307  |
| C  | 5.051452 | 10.198527 | 7.577502  |
| C  | 9.635934 | 8.830050  | 7.324963  |
| C  | 8.956558 | 7.697714  | 7.025676  |
| C  | 9.739952 | 11.127190 | 7.905119  |
| C  | 9.165760 | 12.318808 | 8.194352  |
| C  | 6.591540 | 7.253057  | 5.390617  |
| H  | 5.497438 | 7.266132  | 5.366504  |
| C  | 6.528212 | 6.539651  | 8.133736  |
| H  | 6.888864 | 5.553307  | 7.821576  |
| C  | 6.827046 | 12.983078 | 9.791736  |
| H  | 5.736338 | 13.073033 | 9.798611  |
| C  | 6.876302 | 13.702619 | 7.049883  |
| H  | 7.324251 | 14.649711 | 7.370416  |
| F  | 4.283150 | 11.248286 | 7.828896  |
| F  | 4.190929 | 9.226561  | 7.312425  |
| H  | 7.272283 | 13.963782 | 9.992720  |
| H  | 7.127692 | 12.282246 | 10.573680 |
| H  | 5.786146 | 13.798309 | 7.055464  |
| H  | 7.204969 | 13.473112 | 6.033901  |
| H  | 5.434107 | 6.548164  | 8.111133  |
| H  | 6.861384 | 6.739734  | 9.154468  |
| H  | 6.945541 | 6.234252  | 5.197951  |
| H  | 6.969052 | 7.920356  | 4.612693  |
| H  | 9.761506 | 13.195864 | 8.429384  |

|   |           |           |          |
|---|-----------|-----------|----------|
| H | 10.830340 | 11.025123 | 7.905207 |
| H | 10.730922 | 8.828271  | 7.344173 |
| H | 9.470616  | 6.767794  | 6.801205 |

31

**Rh\_PINCER\_STRIPPED\_CF2\_45DEG**

|    |           |           |           |
|----|-----------|-----------|-----------|
| Rh | 6.911330  | 10.116351 | 7.602412  |
| P  | 7.179943  | 7.863596  | 7.026185  |
| P  | 7.383352  | 12.366634 | 8.088129  |
| N  | 9.024389  | 10.020612 | 7.603599  |
| C  | 5.040864  | 10.144347 | 7.668776  |
| C  | 9.642356  | 8.841255  | 7.331797  |
| C  | 8.962313  | 7.702757  | 7.053047  |
| C  | 9.746392  | 11.140265 | 7.873283  |
| C  | 9.173740  | 12.342650 | 8.121754  |
| C  | 6.629952  | 7.382748  | 5.346339  |
| H  | 5.537282  | 7.405299  | 5.296323  |
| C  | 6.493980  | 6.500955  | 8.037339  |
| H  | 6.857734  | 5.530559  | 7.681774  |
| C  | 6.832932  | 13.027316 | 9.705042  |
| H  | 5.743898  | 13.132570 | 9.707777  |
| C  | 6.897459  | 13.719803 | 6.953909  |
| H  | 7.366445  | 14.662955 | 7.255839  |
| F  | 4.279178  | 10.720056 | 8.582812  |
| F  | 4.184934  | 9.513913  | 6.880074  |
| H  | 7.292392  | 14.002066 | 9.903462  |
| H  | 7.118859  | 12.325642 | 10.491809 |
| H  | 5.809830  | 13.839406 | 6.965304  |
| H  | 7.213241  | 13.469464 | 5.938801  |
| H  | 5.401056  | 6.518864  | 7.975117  |
| H  | 6.789471  | 6.637949  | 9.079756  |
| H  | 6.985175  | 6.377011  | 5.095481  |
| H  | 7.029952  | 8.097892  | 4.624043  |
| H  | 9.768221  | 13.226329 | 8.334230  |
| H  | 10.836744 | 11.037113 | 7.878465  |
| H  | 10.737445 | 8.840190  | 7.347772  |
| H  | 9.472708  | 6.768624  | 6.838692  |

31

**Rh\_PINCER\_STRIPPED\_CF2\_PERP**

|    |          |           |          |
|----|----------|-----------|----------|
| Rh | 6.897614 | 10.113963 | 7.595079 |
| P  | 7.197896 | 7.860273  | 7.022702 |
| P  | 7.401106 | 12.333712 | 8.166699 |
| N  | 9.034621 | 10.013642 | 7.610110 |
| C  | 5.027248 | 10.184995 | 7.576884 |
| C  | 9.653854 | 8.842886  | 7.322474 |
| C  | 8.976845 | 7.708031  | 7.018040 |
| C  | 9.757605 | 11.120812 | 7.907933 |

|   |           |           |           |
|---|-----------|-----------|-----------|
| C | 9.186455  | 12.315265 | 8.200487  |
| C | 6.594824  | 7.288261  | 5.391833  |
| H | 5.500400  | 7.301065  | 5.379209  |
| C | 6.542914  | 6.566710  | 8.139938  |
| H | 6.897098  | 5.575172  | 7.836754  |
| C | 6.833176  | 12.970809 | 9.786295  |
| H | 5.742880  | 13.066327 | 9.782774  |
| C | 6.895316  | 13.682031 | 7.036457  |
| H | 7.342262  | 14.633804 | 7.344694  |
| F | 4.239543  | 10.452615 | 6.552097  |
| F | 4.199953  | 9.960409  | 8.580645  |
| H | 7.281154  | 13.947785 | 9.999474  |
| H | 7.120371  | 12.263134 | 10.567038 |
| H | 5.805129  | 13.777271 | 7.038996  |
| H | 7.224045  | 13.439807 | 6.023519  |
| H | 5.448734  | 6.581255  | 8.119950  |
| H | 6.877585  | 6.774386  | 9.158598  |
| H | 6.947249  | 6.272740  | 5.179671  |
| H | 6.961746  | 7.967518  | 4.619304  |
| H | 9.779293  | 13.193604 | 8.436971  |
| H | 10.847935 | 11.016820 | 7.906096  |
| H | 10.748958 | 8.842851  | 7.341932  |
| H | 9.487390  | 6.777517  | 6.789498  |

31

**Rh\_PINCER\_STRIPPED\_CH2\_INPLANE**

|    |          |           |          |
|----|----------|-----------|----------|
| Rh | 6.918454 | 10.106152 | 7.604752 |
| P  | 7.160957 | 7.842887  | 7.036062 |
| P  | 7.366239 | 12.335951 | 8.179367 |
| N  | 9.023188 | 10.006758 | 7.617222 |
| C  | 5.039043 | 10.195860 | 7.592629 |
| C  | 9.638532 | 8.824882  | 7.327699 |
| C  | 8.953111 | 7.695152  | 7.029170 |
| C  | 9.743599 | 11.125465 | 7.915120 |
| C  | 9.164103 | 12.314668 | 8.207186 |
| C  | 6.587541 | 7.232243  | 5.404519 |
| H  | 5.493026 | 7.245834  | 5.375120 |
| C  | 6.540155 | 6.520871  | 8.144953 |
| H  | 6.896307 | 5.535898  | 7.823166 |
| C  | 6.833043 | 12.997403 | 9.804673 |
| H  | 5.741783 | 13.086322 | 9.820916 |
| C  | 6.884763 | 13.710129 | 7.064633 |
| H  | 7.327137 | 14.657705 | 7.391690 |
| H  | 4.357303 | 9.360037  | 7.364267 |
| H  | 4.437398 | 11.093922 | 7.809534 |
| H  | 6.965752 | 7.894328  | 4.622440 |
| H  | 6.938647 | 6.211194  | 5.217944 |
| H  | 6.884855 | 6.716123  | 9.162815 |
| H  | 5.445209 | 6.525280  | 8.139468 |
| H  | 7.221984 | 13.483546 | 6.050766 |



|   |           |           |           |
|---|-----------|-----------|-----------|
| H | 5.794168  | 13.807702 | 7.057002  |
| H | 7.138142  | 12.302729 | 10.590408 |
| H | 7.275907  | 13.981086 | 9.996672  |
| H | 9.759183  | 13.192990 | 8.440956  |
| H | 10.835317 | 11.031993 | 7.911524  |
| H | 10.734088 | 8.815191  | 7.344038  |
| H | 9.465568  | 6.764494  | 6.802224  |

31

**Rh\_PINCER\_STRIPPED\_CH2\_45DEG**

|    |           |           |           |
|----|-----------|-----------|-----------|
| Rh | 6.894013  | 10.106256 | 7.571755  |
| P  | 7.204968  | 7.837461  | 7.043034  |
| P  | 7.399857  | 12.315930 | 8.183601  |
| N  | 9.048967  | 10.001777 | 7.610509  |
| C  | 5.036517  | 10.220039 | 7.524066  |
| C  | 9.668767  | 8.831295  | 7.320196  |
| C  | 8.987906  | 7.694433  | 7.029645  |
| C  | 9.767465  | 11.103423 | 7.940245  |
| C  | 9.187717  | 12.293621 | 8.235959  |
| C  | 6.618035  | 7.380670  | 5.367409  |
| H  | 5.523554  | 7.410953  | 5.344342  |
| C  | 6.578746  | 6.432706  | 8.038739  |
| H  | 6.976690  | 5.485169  | 7.658083  |
| C  | 6.819807  | 12.755140 | 9.866391  |
| H  | 5.726789  | 12.824278 | 9.868658  |
| C  | 6.928773  | 13.815259 | 7.241172  |
| H  | 7.402719  | 14.704834 | 7.671408  |
| H  | 4.407713  | 9.856611  | 6.694209  |
| H  | 4.408786  | 10.708557 | 8.287764  |
| H  | 7.004437  | 8.107095  | 4.648930  |
| H  | 6.958330  | 6.376855  | 5.089381  |
| H  | 6.887183  | 6.560253  | 9.078428  |
| H  | 5.485813  | 6.406161  | 7.995979  |
| H  | 9.497477  | 6.760924  | 6.809670  |
| H  | 10.764607 | 8.826292  | 7.336371  |
| H  | 10.858765 | 11.004250 | 7.957764  |
| H  | 9.775660  | 13.171770 | 8.486315  |
| H  | 7.247638  | 13.704971 | 6.202627  |
| H  | 5.842139  | 13.941570 | 7.264785  |
| H  | 7.122871  | 11.967555 | 10.559947 |
| H  | 7.243531  | 13.711563 | 10.192681 |

31

**Rh\_PINCER\_STRIPPED\_CH2\_PERP**

|    |          |           |          |
|----|----------|-----------|----------|
| Rh | 6.855743 | 10.109023 | 7.605220 |
| P  | 7.212397 | 7.859167  | 7.019602 |
| P  | 7.417082 | 12.316898 | 8.195052 |
| N  | 9.052928 | 10.005841 | 7.615123 |

|   |           |           |           |
|---|-----------|-----------|-----------|
| C | 5.008054  | 10.182484 | 7.597299  |
| C | 9.670781  | 8.841161  | 7.321024  |
| C | 8.988631  | 7.708905  | 7.010121  |
| C | 9.774874  | 11.104979 | 7.924490  |
| C | 9.199474  | 12.296388 | 8.229767  |
| C | 6.611367  | 7.284568  | 5.387371  |
| H | 5.516861  | 7.283380  | 5.378566  |
| C | 6.566168  | 6.548810  | 8.124518  |
| H | 6.938707  | 5.565281  | 7.816358  |
| C | 6.852570  | 12.947108 | 9.819865  |
| H | 5.763492  | 13.055690 | 9.813589  |
| C | 6.916765  | 13.684604 | 7.083798  |
| H | 7.380409  | 14.626322 | 7.398922  |
| H | 4.373565  | 9.996088  | 8.479347  |
| H | 4.394989  | 10.410660 | 6.709992  |
| H | 6.969508  | 7.969424  | 4.615761  |
| H | 6.977216  | 6.273902  | 5.173499  |
| H | 6.889762  | 6.753511  | 9.147259  |
| H | 5.472113  | 6.547957  | 8.093332  |
| H | 7.232366  | 13.449887 | 6.065012  |
| H | 5.827892  | 13.793404 | 7.100446  |
| H | 7.131129  | 12.230194 | 10.595171 |
| H | 7.312817  | 13.916958 | 10.040351 |
| H | 9.787360  | 13.175975 | 8.474413  |
| H | 10.866725 | 11.007550 | 7.922278  |
| H | 10.766770 | 8.833507  | 7.340244  |
| H | 9.493361  | 6.776837  | 6.774317  |

## VII. References

---

- 1 M. Puri, S. Gatard, D. A. Smith and O. V. Ozerov, *Organometallics*, 2011, **30**, 2472.
- 2 L. P. Press, B. J. McCulloch, W. Gu, C.-H. Chen, B. M. Foxman and O. V. Ozerov, *Chem Commun.*, 2015, **51**, 14034.
- 3 S. Gatard, C. Guo, B. M. Foxman, O. V. Ozerov, *Organometallics*, 2007, **26**, 6066.
- 4 APEX2 “Program for Data Collection and Integration on Area Detectors” BRUKER AXS Inc., 5465 East Cheryl Parkway, Madison, WI 53711-5373 USA.
- 5 G. M. Sheldrick, “SADABS (version 2008/1): Program for Absorption Correction for Data from Area Detector Frames”, University of Göttingen, Germany, 2008.
- 6 G. M. Sheldrick, *Acta Cryst.*, 2008, **A64**, 112.
- 7 A. L. Spek, (2006) PLATON – A Multipurpose Crystallographic Tool, Utrecht University, Utrecht, The Netherlands. A. L. Spek, *Acta Cryst.*, 1990, **A46**, C34.
- <sup>8</sup> Y. Zhao and D. G. Truhlar, *Theor. Chem. Acc.*, 2008, **120**, 215.
- <sup>9</sup> Y. Zhao and D. G. Truhlar, *Acc. Chem. Res.* 2008, **41**, 157.
- <sup>10</sup> W. R. Wadt and P. J. Hay, *J. Chem. Phys.*, 1985, **82**, 284.
- <sup>11</sup> P. J. Hay and W. R. Wadt, *J. Chem. Phys.* 1985, **82**, 299.
- <sup>12</sup> P. J. Hay and W. R. Wadt, *J. Chem. Phys.* 1985, **82**, 270.
- <sup>13</sup> T. H. Dunning and P. J. Hay in *Modern Theoretical Chemistry, Vol. 4: Applications of Electronic Structure Theory*; ed. H. F. Schaefer III, Plenum, 1977, pp 461.
- <sup>14</sup> M. J. Frisch, J. A. Pople and J. S. Binkley, *J. Chem. Phys.*, 1984, **80**, 3265.

- 
- <sup>15</sup> T. Clark, J. Chandrasekhar, G. W. Spitznagel and P. V. R. Schleyer, *J. Comput. Chem.*, 1983, **4**, 294.
- <sup>16</sup> A. D. McLean and G. S. Chandler, *J. Chem. Phys.* 1980, **72**, 5639.
- <sup>17</sup> R. Krishnan, J. S. Binkley, R. Seeger and J. A. Pople *J. Chem. Phys.* 1980, **72**, 650.
- <sup>18</sup> A. D. Bochevarov, E. Harder, T. F. Hughes, J. R. Greenwood, D. A. Braden, D. M. Philipp, D. Rinaldo, M. D. Halls, J. Zhang and R. A. Friesner, *Int. J. Quantum Chem.* 2013, **113**, 2110.
- <sup>19</sup> *Jaguar, versions 7.0-9.3*; Schrödinger, LLC, New York, NY, 2007-2016.
- <sup>20</sup> C. R. Landis and F. Weinhold in *The Chemical Bond: Fundamental Aspects of Chemical Bonding*, ed. G. Frenking and S. Shaik, Wiley-VCH Verlag GmbH & Co. KGaA, Weinheim, 2014, vol. 1, pp 91-119.
- <sup>21</sup> E. D. Glendening, J. K. Badenhoop, A. K. Reed, J. E. Carpenter, J. A. Bohmann, C. M. Morales, C. R. Landis and F. Weinhold, *NBO 6.0*, Theoretical Chemistry Institute, University of Wisconsin, Madison, WI, 2013.
- <sup>22</sup> F. Weinhold and C. R. Landis, *Discovering Chemistry with Natural Bond Orbitals*; John Wiley & Sons, Hoboken, 2012.
- <sup>23</sup> E. D. Glendening, C. R. Landis, and F. Weinhold, *Wiley Interdisciplinary Reviews: Computational Molecular Science*, 2012, **2**, 1.
- <sup>24</sup> F. Weinhold and C. R. Landis, *Valency and Bonding: A Natural Bond Orbital Donor-Acceptor Perspective*, Cambridge University Press, Cambridge, 2005.
- <sup>25</sup> A. E. Reed, L. A. Curtiss and F. Weinhold, *Chem. Rev.*, 1988, **88**, 899.
- <sup>26</sup> K. B. Wiberg, *Tetrahedron*, 1968, **24**, 1083.
